# Supplementary material for: The foot in multistage ultra-marathon runners: experience in a cohort study of 22 participants of the Trans Europe Footrace Project with mobile MRI
Source: PubMed Central journal article supplement — BMJ Open. 2012 May 22;2(3):e001118. doi: 10.1136/bmjopen-2012-001118 (PMC3364457; doi:10.1136/bmjopen-2012-001118), 2012-05-22
Supplement: bmjopen-2012-001118.draft_revisions.pdf [file bmjopen-2012-001118.draft_revisions.pdf]

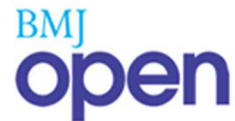

**The foot in multistage ultra marathon runners: Experience  
in a cohort study of 22 participants of the Trans Europe  
Footrace project with mobile MRI.**

|                                 |                                                                                                                                                                                                                                                                                                                          |
|---------------------------------|--------------------------------------------------------------------------------------------------------------------------------------------------------------------------------------------------------------------------------------------------------------------------------------------------------------------------|
| Journal:                        | <i>BMJ Open</i>                                                                                                                                                                                                                                                                                                          |
| Manuscript ID:                  | bmjopen-2012-001118                                                                                                                                                                                                                                                                                                      |
| Article Type:                   | Research                                                                                                                                                                                                                                                                                                                 |
| Date Submitted by the Author:   | 13-Mar-2012                                                                                                                                                                                                                                                                                                              |
| Complete List of Authors:       | Freund, Wolfgang; University Hospitals Ulm, Diagnostic and Interventional Radiology<br>Weber, Frank; German Armed Forces Hospital, Neurology<br>Billich, Christian; University Hospitals Ulm, Diagnostic and Interventional Radiology<br>Schuetz, Uwe; University Hospitals Ulm, Diagnostic and Interventional Radiology |
| <b>Primary Subject Heading</b>: | Sports and exercise medicine                                                                                                                                                                                                                                                                                             |
| Secondary Subject Heading:      | Radiology and imaging                                                                                                                                                                                                                                                                                                    |
| Keywords:                       | Foot & ankle < ORTHOPAEDIC & TRAUMA SURGERY, Musculoskeletal disorders < ORTHOPAEDIC & TRAUMA SURGERY, Orthopaedic sports trauma < ORTHOPAEDIC & TRAUMA SURGERY, Magnetic resonance imaging < RADIOLOGY & IMAGING, SPORTS MEDICINE                                                                                       |
|                                 |                                                                                                                                                                                                                                                                                                                          |

SCHOLARONE™  
Manuscripts

only

1  
2  
3 **The foot in multistage ultra marathon runners: Experience in a cohort study of**  
4 **22 participants of the Trans Europe Footrace project with mobile MRI.**  
5

6 Short title: MRI based observation for foot lesions during a multistage ultra marathon.  
7

8 Wolfgang Freund MD<sup>1</sup>, Frank Weber MD<sup>2</sup>, Christian Billich MD<sup>1</sup>, Uwe H Schuetz  
9 MD<sup>1</sup>.  
10

11 Affiliation:

12  
13 <sup>1</sup>Department of Diagnostic and Interventional Radiology, University Hospitals, Ulm,  
14 Germany.  
15

16 <sup>2</sup>German Armed Forces Hospital, Department of Neurology, Ulm, Germany.  
17  
18  
19

20 Corresponding author:

21 PD Dr. Wolfgang Freund

22  
23 Klinik für Diagnostische und Interventionelle Radiologie  
24 Universitätsklinik Ulm  
25 Steinhoevelstraße 9  
26 89075 Ulm  
27 Germany  
28 Fax: +49 731 50061002,  
29 or better by e-mail: freund-ulm@t-online.de  
30  
31  
32  
33  
34  
35  
36  
37  
38  
39  
40  
41  
42  
43  
44  
45  
46  
47  
48  
49  
50  
51  
52  
53  
54  
55  
56  
57  
58  
59  
60

36 Keywords:

37 MRI, Achilles tendon, foot, ultra marathon, stress reaction.  
38

39 Word count: 2703  
40  
41  
42  
43  
44  
45  
46  
47  
48  
49  
50  
51  
52  
53  
54  
55  
56  
57  
58  
59  
60

## ABSTRACT

### Objectives

67 runners participated in the Trans Europe FootRace 2009 (TEFR09), a 4487 km (2789 mi) multi stage ultra marathon covering the south of Europe (Bari, Italy) to the North Cape. Reports on ultra marathons are lacking, but the literature reports overuse injuries in athletes, especially to the Achilles tendon (AT), ankle or hind foot. Bone edema may be related to exposure and is present in fatigue fractures. The aim of the study therefore was to determine prospectively if sustained maximal load during an ultra marathon leads to damage to the foot.

### Design and Participants

In a cohort study, repeated scanning of the 22 athletes participating in the study was performed before and during (approximately every 1000 km) the race. Using the obtained fat saturated inversion recovery sequence, two experienced readers blinded to the clinical data rated the images regarding foot lesions. Statistical analysis included regression analysis and computation of the interrater reliability.

### Setting

The TEFR09 course. MRI scanning was performed according to prearranged schedules for every participant, using a mobile 1.5 Tesla MRI unit on a trailer following the race.

### Primary outcome measures

MRI data such as AT diameter, bone or tendon lesions, subcutaneous, plantar fascia or intraosseous edema.

### Results

The 22 study participants did not differ significantly from the total of the 68 TEFR09 runners regarding height, weight and age.

The AT diameter increased significantly from 6.8 to 7.8 mm as did intraosseous signal, bone lesions and subcutaneous edema. However, finishers differed only regarding plantar aponeurosis and subcutaneous edema from participants aborting the TEFR09. Interrater reliability was 0.88-0.98.

### Conclusions

Under the extreme stress of the TEFR09, an increase of the AT diameter as well as bone signal are thought to be adaptive, since only subcutaneous edema and plantar fascia edema were related to abortion of the race.

**ARTICLE SUMMARY**

## Article focus:

- A study on effects of ultra marathon running, in this case the multi stage TransEurope FootRace covering 4487 km from Bari (Italy) to the North Cape.
- Observational cohort study using MRI to look for possible lesions to the foot.

## Key messages:

- During sustained maximal load, Achilles tendon diameter and bone MRI STIR signal (hinting at subtle edema) increases. This is thought to be adaptive.
- Subcutaneous edema and plantar fascia signal were related to abortion of the race. These measurements seem to be related to relevant changes leading to discontinuation of the run.
- No relevant new foot joint or tendon lesions were detected during the race over 4487 km.

## Strengths and limitations of this study:

- Repeated measurement prospectively during the run was possible only because of the mobile MRI unit used for this research project.
- The number of included runners (22) is high compared to other MRI based studies but may have been too small to detect less frequent lesions.



## INTRODUCTION

In 2009 (April 19th to June 21th) the TransEurope FootRace 2009 (TEFR09) took place. It was the second European transcontinental multistage ultra marathon race and covered the distance from the south of Italy (Bari) to the North Cape. A collective of 67 endurance runners with a mean age 50.5 years (range 26 to 74) and consisting of 11 women and 56 men from 12 nations met the challenge. Their goal was to run the 4,487 km in 64 days without any day rest. Thus they expected to complete an average distance of 70.1 km resp. 1.7 marathon distances (min 44 km, max 95.1 km) on every stage for 64 consecutive days.[1]

The permanent overuse during such an ultra marathon especially endangers ankle and foot. While reliable reports on ultra marathon effects are lacking, the present literature describes overuse injuries [2, 3] in endurance sport and shows the Achilles tendon (AT) to be a structure of high risk because it is regularly injured in sports.[4, 5] Also, ankle and hind foot injuries are frequent among athletes,[6, 7] with visible bone edema even in asymptomatic individuals increasing their exposure.[8] Other reports show high rates of fatigue fractures in army recruits after exerting marches.[9, 10] To diagnose these sport related injuries, MRI is the diagnostic procedure of choice.[11-13] In most reports, MRI was performed with sagittally oriented fat saturated T2 weighted sequences.[14]

The present study with serial MRI before and during the run was performed under the hypothesis that long distance endurance runners are able to endure the race associated injuries and the accompanying pain but will nevertheless show changes in Achilles tendon and bones of the foot. We expected the changes to accumulate during the run. Also we expected that bone marrow edema will increase during the run but decrease during pauses. Furthermore we expected that participants aborting the race will have more severe lesions on MRI. Finally we were looking for predictive parameters (risk factors) indicating failure to complete the run.

## PARTICIPANTS AND METHODS

### Study participants

After approval of the local ethics committee and in accordance to the Declaration of Helsinki, the participants of the TEFR ultra marathon were recruited for the MRI based cohort study. The inclusion criterion for the ultra marathon group obviously was participation in the event, exclusion criteria were contraindications against MRI. Since MRI scanning time and the athletes' time was limited, only a part of the examinations concerned the foot region. Of the 44 athletes consenting to participate in the MRI project, 22 were randomized into the foot study. Their data will be presented here.

### MRI acquisition

For each measurement, both feet were scanned consecutively with a dedicated foot coil that was table fixed with a boot-like design and 8-channel coils. MRI data were acquired with a mobile 1.5T MR scanner (Magnetom Avanto™ mobile MRI 02.05, software version: Syngo™ MR B15, Siemens Ltd., Erlangen, Germany) on a MRI-trailer travelling with the runners on the TEFR09 from stage to stage, day by day.

1  
2  
3 The MRI measurements were planned in a schedule for each participant, assuring  
4 equal distribution of measurements at all timepoints.  
5 Every participant was scanned at a baseline time point 1 prior to the run and roughly  
6 every 1000 km or directly after abortion of the run. Schedules were made for time  
7 point 2 (day 17-22 at km 1131-1487), time point 3 (day 29-35 at km 1985- 2362), time  
8 point 4 (day 43-46 at km 2964-3161) and time point 5 (day 50 to 58 at km 3430-  
9 4037).  
10

### 11 **MRI sequences**

12 The imaging sequence used in the reported study was a fat saturated short tau  
13 inversion recovery (STIR) sagittal sequence, resulting in a T2-weighted fat  
14 suppressed image with edema or effusion showing as increased signal. Sequence  
15 parameters were:  
16

17 Slice thickness of 2 mm, repetition time was 8490 ms, echo time 60 ms, inversion  
18 time 120 ms. Flip angle was 140°, echo train length 13, bandwidth 130 Hz/voxel, the  
19 matrix was 512x512 (interpolated from 358x358), field of view 300x300 mm and time  
20 of acquisition was 3min 50s for each side.  
21  
22

### 23 **MRI data measurements**

24 Two researchers (experienced radiologists WF and US) without access to clinical  
25 data independently assessed the datasets at PACS workstations. All signal  
26 intensities were measured in a region of interest covering a volume of 25mm<sup>2</sup>.  
27 The measurements closely resemble the technique published earlier.[15]  
28

29  
30 The following measurements (see also table 1) were made on the sagittal MRI  
31 images:

32 The greatest anteroposterior diameter of the Achilles tendon (AT) and AT signal  
33 intensity at insertion. Also, signal intensity at mid tendon or at site of lesion, if a lesion  
34 is visible, and lesion distance from AT insertion were taken. The number of new  
35 lesions in comparison to the preceding examination was counted.

36 The signal intensity of the calcaneus at AT insertion and at a normally innocuous  
37 area in the middle between most cranial point of the posterior talocalcaneal articular  
38 surface and the most caudal point of the lateral process of the calcaneus (see figure  
39 1) was measured.

40 The highest intraosseous signal intensity in any bone of the foot was taken.

41 The number of bone bruises / subchondral or osseous lesions was noted.

42 The signal intensity of fascia plantaris was rated, taking note if there was edema or  
43 effusion (yes/no).

44 Also a possible bursa retrocalcanealis greater than 2 mm sagittally was noted  
45 (yes/no).

46 Any soft tissue signal intensity indicative of fasciitis, peritendonitis, subcutaneous  
47 edema (see figure 2) was noted (yes/no).  
48  
49

### 50 **Finisher status**

51 To allow discrimination between runners finishing the race and others aborting, their  
52 status F (finisher) or NF (non finisher) was recorded, also the stated cause (Table 2).  
53  
54

### 55 **Time from finish of stage to MRI**

56 Since it was hypothesized that bone marrow edema will increase during the run and  
57 decrease during rest (presumably lying down), the time from finish of the daily run to  
58 MRI scanning was recorded. For non finishers the time point has not been recorded  
59  
60

1  
2  
3 because they stayed at some checkpoint until transportation. Therefore, their last  
4 resting period was guessed to start at noon.  
5  
6

### 7 **Interrater reliability**

8 Interrater reliability was calculated on two measurements where previous data [15]  
9 had demonstrated good reliability: AT diameter and intraosseous signal intensity of  
10 the calcaneus (this time at the clearly defined “innocuous” location described above).  
11

### 12 **Statistical analysis**

13 Data were analyzed using R. version 2.11.1, R Foundation for Statistical Computing,  
14 2010.[16] Given the longitudinal nature of the test data, specialised regression  
15 models (linear mixed effect models) were applied. The package “nlme” [17] was  
16 used.  
17

18 Univariate and multivariate regression analyses were performed.

19 Results were significant when p was < 0.05.

20 Taking into account the critique of Bland and Altman [18] concerning the correlation  
21 coefficient to calculate the interrater reliability, we decided to use lambda as  
22 proposed by Jepsen et. al.[19] Lambda can be calculated as follows:  
23

$$24 \lambda = \frac{2 \cdot VAR_X - VAR_D}{2 \cdot VAR_X}$$

25  
26  
27 VAR denotes the variance of the measurements X and D the difference of the  
28 measurements of the two raters. The interrater-reliability is rated as low for  $\lambda < 0.25$ .  
29 Values up to .5 are rated as fair, .5-.75 as moderate to good and  $\lambda > 0.75$   
30 demonstrates good to excellent reliability.[20]  
31

## 32 **RESULTS**

### 33 **Study participants**

34 The TEFRO9 participants comprised 57 men and 11 women, aged 26 to 74 years  
35 with a mean of 50.5 and a standard deviation (SD) of 10.5 years. They had a body  
36 height of 1.75 m (SD .08) and weight of 70.6 kg (SD 9.5).  
37

38 Out of the total, 22 participated in this experiment. 2 were female and 20 male with a  
39 mean age of 49.1 years (11.5) at the time of the first MRI scan. They were 1.74 m  
40 (.09) tall and weighed 70.9 kg (11.3). The differences of the biometric markers of our  
41 sample to the whole group were not significant (t-test p= 0.6 - 0.9).  
42

43 Exemplary measurements are shown in figure 1. The evolution of soft tissue and  
44 osseous edema is depicted in figure 2 and foot swelling as well as resulting shoe  
45 modifications are shown in figure 3.  
46

### 47 **MRI measurements**

48 The predefined parameters were taken on the MRI examinations. The resulting  
49 measurements are detailed in table 1. The evolution of intraosseous signal intensities  
50 is depicted in figure 4.  
51

52  
53  
54 **Table 1:** Measurements of MRI parameters and correlation with distance run

### 55 **Time from stage finish to MRI examination**

56 There was no significant effect of the time elapsed between stage finish and  
57 scanning (i.e. the length of the resting period before the scan, spent lying down and  
58  
59  
60

thus decreasing potential edema) on the measured MRI parameters to be found in univariate and multivariate regression analyses.

### Side differences

Looking for significant side differences in the observed measures, the following were found to be larger on the right side: Signal intensity of the AT at insertion ( $p=0.04$ ), the number of bone lesions (0.002), the signal intensity of the plantar aponeurosis (0.03). The distance to an AT lesion from the point of calcaneal insertion ( $p=0.04$ ) was larger on the left side.

### Differences between finishers and non finishers

21 athletes out of 67 participants had to exit the race. Out of the 22 participants in our study, 13 (59.1%) completed our study, while 12 finished the TEFRO9, and 10 aborted the run. The athlete who finished our study (participation in the MRI at time point 5) but had to abort the race afterwards because of a hand phlegmonia has been counted as not aborting for our study, since the cause for abortion was not related to a problem of the feet and the measurements are thought to be independent from the later evolution of a hand phlegmonia.

The rate of abortion didn't differ significantly between the total and our study participants. The stated causes are listed in table 2. Most of the problems occurred in the lower legs (shin splint and perimyositis).

F and NF showed significant differences at the beginning of the TEFRO9 only in the signal intensity of the plantar aponeurosis ( $p=0.03$ ).

During the run, there were significant differences in the evolution of edema of the right plantar aponeurosis ( $p=0.02$ ) and subcutaneous edema of the right (0.05) and left side (0.04), with NF showing higher rates of edema.

### Interrater reliability

The interrater reliability was calculated for the diameter of the AT as well as the Signal intensity of an innocuous region of the calcaneus. The lambda values were for AT diameter of the right /left side 0.95 / 0.88 and for the signal intensity of the normally innocuous region of the calcaneus on the right/ left side 0.97 / 0.98 respectively.

## DISCUSSION

The TEFRO9 participants had to endure an immense physical exposure, leading to stress fractures, swollen feet, sometimes necessitating cutting away part of the running shoe in order to continue running,[1] but 46 out of 67 (68.7%) were able to finish. Our study participants showed changes during the run with an increase of the AT diameter and intraosseous signal intensity as well as subcutaneous edema. Non finishers displayed higher rates of soft tissue edema.

We had hypothesized that runners will show increasing pathology of hindfoot and ankle as well as AT during the run even if they are able to finish the TEFRO9.

The literature up to date had been inconclusive as to the consequences of marathon training, including our own data[15] that had shown little changes in MRI appearance of the hindfoot and AT during training and participation of a (half) marathon.

However, the TEFRO9 with extended running load over 64 stages without any day rest is not comparable to other sporting events or normal leisure activities.

The results show a gradual increase of the diameter of the AT from a mean of 6.8 to a mean of 7.8mm over the course of the run. This stands in contrast to reports linking

1  
2  
3 AT diameter to disease[21] or showing decrease of AT diameter with training.[22]  
4 However, the results match with previous data on runners[23] and healthy  
5 marathoners[15] or reports stressing the relevance of AT signal intensity SI[24] or  
6 calcaneus edema at tendon insertion[25] for pathology. No significant correlation  
7 could be shown to tendon signal intensity or lesions or calcaneus bone edema at  
8 tendon insertion, further strengthening the point that the observed AT changes seem  
9 to be adaptive.  
10

11 Furthermore, gradual increases over the run in osseous signal of the calcaneus as  
12 well as the maximal intraosseous signal in any foot bone and the number of bone  
13 lesions could be shown (see figure 4).

14 The increased signal intensity draws attention to reports on stress fractures,[9, 10]  
15 but the appearance of the recorded alterations in our study occurred early and didn't  
16 coincide with stress fractures. Thus the signal increase is thought to result from  
17 stress response[12] as reported in asymptomatic runners.[8, 26-28] Sometimes  
18 diffuse bone edema in nearly all end phalanges pointed to contusions because of  
19 tight shoes. However, bone edema and lesions were not linked to abortion of the run  
20 (NF status).  
21  
22

23 Also, increases in subcutaneous edema occurred over the course of the run (see  
24 figure 2). Here, subcutaneous edema at the time of the start of TEFRO9 was rare with  
25 around 5% (see table 1), while it rose sharply at time point 2 (after a mean of  
26 1068km) to ca. 65% and increased only moderately to ca. 70% at time point 5 (after a  
27 mean of 3669km). This corresponds to the sometimes grotesque swelling of runners'  
28 feet, necessitating cutting of running shoes to resemble crude sandals (see figure 3).  
29  
30

31 We had hypothesized that bone edema and the corresponding SI would decrease  
32 during rest (lying down). However, our data showed no correlation of the resting time  
33 to the SI. So the observed bone edema seems to reflect true load effects and not  
34 simple hydrostatic changes.  
35  
36

37 We had expected to see more severe lesions in NF than in F and had hoped to find  
38 risk factors or predictive parameters for NF. Here, significant differences could be  
39 shown only for soft tissue parameters: At the beginning of the TEFRO9 only the SI of  
40 the left plantar aponeurosis was significantly higher in NF, pointing to possible  
41 overload even before the start. During the run, NF showed significantly more  
42 subcutaneous edema and edema of the (right) plantar aponeurosis. This may  
43 indicate that soft tissue edema is more relevant to the possible abortion of the run  
44 than the intraosseous changes described above or tendon problems. Especially the  
45 signal alterations in the plantar aponeurosis point to plantar fasciitis, a problem  
46 thought to be the main cause of inferior heel pain in runners and is detected easily by  
47 MRI.[29]  
48

49 Considering clinical data on abortion of the run (see table 2), the stated soft-tissue  
50 related causes refer mainly to the legs (mostly shin splint and perimyositis). These  
51 regions were not included in the current investigation. However, it is probable that  
52 edema related to shin splint or perimyositis had spread along the lower legs to the  
53 foot, so that the visible subcutaneous edema was not directly related to a pathology  
54 in the foot.  
55  
56

57 With lambda values between 0.88 and 0.98, the interrater reliability can be rated as  
58 excellent.[20]  
59  
60



**Limitations:**

The chance to observe an event like the TEFRO9 with a mobile MRI scanner had been great, but the difficulties of tight schedules of the athletes prohibited greater numbers.

Poor infrastructure and difficult local situations at the stage destinations sometimes made a nearby commissioning of the mobile MRI impossible. However, the strongest influence forcing the staff to change and adapt their research work daily, was the athlete himself, with his individual personality and more or less daily changing mental and physical condition and necessities: pain, injuries, fatigue, fears, doubts, illness, regeneration program and nutrition plan.

The inclusion of 22 runners permitted detailed examinations but the number may have been too small to detect factors distinguishing NF. However, the study sample of 22 athletes had been randomized out of all participants, their biometric data shows that they are representative of the whole group of TEFRO9 participants. So their results may be generalized.

**Concluding:**

During the TEFRO9 and under extreme stress, adaptive changes like the increase of the AT diameter could be detected with MRI as well as signs of soft tissue overload with swelling and edema. The meaning of the SI increase of the foot bones is thought to resemble a stress response, but is not correlated to abortion of the race or development of stress fractures during the observed transcontinental multistage ultramarathon.

**Competing interests**

None.

**Trial registration**

University of Ulm, Germany Ethics Committee Nr. 78/08-UBB/se.

**Funding statement**

This project was mainly supported by the German Research Association (DFG: "Deutsche Forschungsgemeinschaft"), under grants SCHU 2514/1-1 and SCHU 2514/1-2. Other non-public funds were received from Siemens medical and the Medical Faculty of the University of Ulm. All funding was unrestricted. None of the funding bodies had any role in the study design, data collection, data analysis, data interpretation, manuscript preparation or decision to publish.

**Data sharing statement**

No additional data available.

**REFERENCES**

1. Schulze I. TransEurope-FootRace 2009. Bari-Nordkap - 4.487,7 km in 64 Tagesetappen. Leipzig, Germany: Engelsdorfer Verlag; 2010.

2. Wilder RP, Sethi S. Overuse injuries: tendinopathies, stress fractures, compartment syndrome, and shin splints. *Clin Sports Med*. 2004;**23**(1):55-81,vi.
3. Koh ES, Lee JC, Healy JC. MRI of overuse injury in elite athletes. *Clin Radiol*. 2007;**62**(11):1036-43.
4. Reiter M, Ulreich N, Dirisamer A, et al. [Extended field-of-view sonography in Achilles tendon disease: a comparison with MR imaging]. *Fortschr Roentgenstr*. 2004;**176**(5):704-8.
5. Bleakney RR, White LM. Imaging of the Achilles tendon. *Foot Ankle Clin*. 2005;**10**(2):239-54.
6. Sijbrandij ES, van Gils AP, de Lange EE. Overuse and sports-related injuries of the ankle and hind foot: MR imaging findings. *Eur J Radiol*. 2002;**43**(1):45-56.
7. Haverstock BD. Foot and ankle imaging in the athlete. *Clin Podiatr Med Surg*. 2008;**25**(2):249-62, vi-vii.
8. Trappeniers L, De Maeseneer M, De Ridder F, et al. Can bone marrow edema be seen on STIR images of the ankle and foot after 1 week of running? *Eur J Radiol*. 2003;**47**(1):25-8.
9. Jones BH, Harris JM, Vinh TN, et al. Exercise-induced stress fractures and stress reactions of bone: epidemiology, etiology, and classification. *Exerc Sport Sci Rev*. 1989;**17**:379-422.
10. Milgrom C, Giladi M, Stein M, et al. Stress fractures in military recruits. A prospective study showing an unusually high incidence. *J Bone Joint Surg Br*. 1985;**67**(5):732-5.
11. Shalabi A, Svensson L, Kristoffersen-Wiberg M, et al. Tendon injury and repair after core biopsies in chronic Achilles tendinosis evaluated by serial magnetic resonance imaging. *Br J Sports Med*. 2004;**38**(5):606-12.
12. Rosenberg ZS, Beltran J, Bencardino JT. From the RSNA Refresher Courses. Radiological Society of North America. MR imaging of the ankle and foot. *Radiographics*. 2000;**20**:S153-79.
13. Collins MS. Imaging evaluation of chronic ankle and hindfoot pain in athletes. *Magn Reson Imaging Clin N Am*. 2008;**16**(1):39-58,v-vi.
14. Campbell SE. MRI of sports injuries of the ankle. *Clin Sports Med*. 2006;**25**(4):727-62.
15. Freund W, Billich C, Brambs HJ, et al. [MRI Changes of Achilles Tendon and Hindfoot in Experienced Runners and Beginners during Training and after a (Half)-Marathon Competition.]. *Z Orthop Unfall*. 2011;**149**(4):407-17.
16. R\_Development\_Core\_Team. R: A language and environment for statistical computing. 2.11.1 ed. Vienna: R Foundation for Statistical Computing; 2010.
17. Pinheiro J, Bates D, DebRoy S, et al. nlme: Linear and Nonlinear Mixed Effects Models. R package version 3.1-86. In: Team tRDC, editor. 3.1-86 ed. Vienna: R Foundation for Statistical Computing; 2007.
18. Bland JM, Altman DG. Statistical methods for assessing agreement between two methods of clinical measurement. *Lancet*. 1986;**1**(8476):307-10.
19. Jepsen JR, Laursen LH, Hagert CG, et al. Diagnostic accuracy of the neurological upper limb examination I: inter-rater reproducibility of selected findings and patterns. *BMC Neurol*. 2006;**6**:8.
20. Portney LG, Watkins MP. Correlations. Foundations of clinical research: Applications to practice. Upper Saddle River: Prentice Hall Health; 2000. p. 491-508.
21. Nicholson CW, Berlet GC, Lee TH. Prediction of the success of nonoperative treatment of insertional Achilles tendinosis based on MRI. *Foot Ankle Int*. 2007;**28**(4):472-7.
22. Ohberg L, Lorentzon R, Alfredson H. Eccentric training in patients with chronic Achilles tendinosis: normalised tendon structure and decreased thickness at follow up. *Br J Sports Med*. 2004;**38**(1):8-11.

- 1  
2  
3 23. Kongsgaard M, Aagaard P, Kjaer M, et al. Structural Achilles tendon properties in  
4 athletes subjected to different exercise modes and in Achilles tendon rupture patients. *J Appl*  
5 *Physiol.* 2005;**99**(5):1965-71. Epub 2005/08/06.  
6 24. Gardin A, Bruno J, Movin T, et al. Magnetic resonance signal, rather than tendon  
7 volume, correlates to pain and functional impairment in chronic Achilles tendinopathy. *Acta*  
8 *Radiol.* 2006;**47**(7):718-24.  
9 25. Haims AH, Schweitzer ME, Patel RS, et al. MR imaging of the Achilles tendon:  
10 overlap of findings in symptomatic and asymptomatic individuals. *Skeletal Radiol.*  
11 2000;**29**(11):640-5.  
12 26. Lohman M, Kivisaari A, Vehmas T, et al. MRI abnormalities of foot and ankle in  
13 asymptomatic, physically active individuals. *Skeletal Radiol.* 2001;**30**(2):61-6.  
14 27. Lazzarini KM, Troiano RN, Smith RC. Can running cause the appearance of marrow  
15 edema on MR images of the foot and ankle? *Radiology.* 1997;**202**(2):540-2.  
16 28. Schweitzer ME, White LM. Does altered biomechanics cause marrow edema?  
17 *Radiology.* 1996;**198**(3):851-3.  
18 29. Grasel RP, Schweitzer ME, Kovalovich AM, et al. MR imaging of plantar fasciitis:  
19 edema, tears, and occult marrow abnormalities correlated with outcome. *AJR Am J*  
20 *Roentgenol.* 1999;**173**(3):699-701. Epub 1999/09/02.  
21  
22  
23  
24  
25  
26  
27  
28  
29  
30

### Contributorship

31 WF designed the study, read the images and planned the statistical analysis. He  
32 wrote the manuscript and approved the final manuscript.

33 US designed the study, acquired the MRI data, read the images and critically revised  
34 the manuscript and approved the final manuscript.

35 FW designed and performed the statistical analysis. He wrote parts of the manuscript  
36 and approved the final manuscript.

37 CB designed the study, acquired the MRI data and critically revised the manuscript  
38 and approved the final manuscript.

39 Also, MRI scanning was performed by Heike Wiedelbach.  
40  
41  
42  
43  
44  
45  
46  
47  
48  
49  
50  
51  
52  
53  
54  
55  
56  
57  
58  
59  
60



## Tables

Table 1: Measurements of MRI parameters and correlation with distance run. For quantitative data the mean (with standard error SE) is given, for qualitative data the percentage of positive measurements (mean over both readers). Correlation with distance run: P is calculated by a univariate regression model with the parameter in question as the dependent variable and total distance as the independent variable. Statistically significant correlations are in bold script.

| time point                                        |       | 1             | 2             | 3             | 4             | 5             | correlation with distance run |
|---------------------------------------------------|-------|---------------|---------------|---------------|---------------|---------------|-------------------------------|
| Parameter                                         | side  |               |               |               |               |               |                               |
| mean days run                                     |       | 0.1           | 15.5          | 29.1          | 42.8          | 52.5          |                               |
| mean distance run, in km (in miles)               |       | 5 (3.2)       | 1068 (664)    | 2062 (1282)   | 2964 (1842)   | 3669 (2280)   |                               |
| AT diameter (SE)                                  | right | 6.8 (0.37)    | 7.2 (0.44)    | 7.6 (0.54)    | 7.8 (0.53)    | 7.8 (0.55)    | <b>&lt;0.001</b>              |
|                                                   | left  | 6.8 (0.39)    | 7.3 (0.49)    | 7.6 (0.53)    | 7.7 (0.60)    | 7.8 (0.66)    | <b>&lt;0.001</b>              |
| SI at insertion of AT                             | right | 32.4 (3.96)   | 38.5 (5.39)   | 40.0 (6.49)   | 42.1 (7.08)   | 39.2 (7.43)   | 0.6                           |
|                                                   | left  | 30.4 (1.80)   | 31.8 (2.72)   | 28.5 (1.50)   | 32.2 (2.37)   | 29.5 (1.77)   | 0.5                           |
| SI in the middle of the AT                        | right | 35.9 (2.72)   | 42.9 (6.03)   | 45.5 (4.94)   | 42.2 (6.52)   | 47.9 (8.97)   | 0.05                          |
|                                                   | left  | 38.3 (3.92)   | 41.1 (5.28)   | 36.4 (3.06)   | 36.7 (3.80)   | 34.1 (5.42)   | 0.7                           |
| New lesions in the AT                             | right | NA            | 0.06          | 0.15          | 0             | 0             | 0.33                          |
|                                                   | left  | NA            | 0.03          | 0             | 0.09          | 0             | 0.7                           |
| Distance of the lesion to the insertion of the AT | right | 12.7 (4.02)   | 15.6 (5.19)   | 16.5 (3.52)   | 15.8 (4.23)   | 11.9 (6.03)   |                               |
|                                                   | left  | 21.8 (4.57)   | 21.5 (2.50)   | 26.2 (6.19)   | 24 (6.03)     | 19            |                               |
| SI in the calcaneus at the AT insertion           | right | 112.8 (7.30)  | 153.3 (13.80) | 170.6 (15.66) | 176.8 (19.66) | 180.1 (18.97) | <b>&lt;0.001</b>              |
|                                                   | left  | 107.2 (5.38)  | 144.7 (9.90)  | 160.2 (11.70) | 160.5 (11.54) | 167.0 (12.65) | <b>&lt;0.001</b>              |
| SI in an innocuous area of the calcaneus          | right | 158.2 (6.78)  | 210.8 (18.25) | 243.9 (22.59) | 246.1 (27.49) | 250.2 (26.43) | <b>&lt;0.001</b>              |
|                                                   | left  | 164.0 (7.20)  | 216.4 (14.38) | 248.8 (21.45) | 251.5 (25.1)  | 268.6 (25.33) | <b>&lt;0.001</b>              |
| Maximal SI in any bone                            | right | 312.5 (26.58) | 411.7 (30.17) | 423.3 (32.14) | 386.2 (22.29) | 399.9 (26.10) | <b>0.003</b>                  |
|                                                   | left  | 283.4 (24.29) | 357.7 (24.59) | 385.8 (35.06) | 410.7 (35.43) | 417.3 (39.79) | <b>&lt;0.001</b>              |
| Number of bone lesions                            | right | 2.1 (0.6)     | 3.2 (0.62)    | 3.5 (0.58)    | 3.2 (0.59)    | 3.6 (0.61)    | <b>0.016</b>                  |
|                                                   | left  | 2.3 (0.44)    | 2.4 (0.43)    | 2.3 (0.45)    | 3.1 (0.54)    | 3.2 (0.55)    | <b>0.002</b>                  |
| SI in the plantar aponeurosis                     | right | 25.4          | 28            | 27.9          | 33.7          | 34.8          | 0.4                           |

|                                        |       |                |                |                |                |                |                  |
|----------------------------------------|-------|----------------|----------------|----------------|----------------|----------------|------------------|
|                                        |       | (4.95)         | (5.79)         | (6.59)         | (8.86)         | (9.54)         |                  |
|                                        | left  | 21.4<br>(1.31) | 22.4<br>(1.29) | 22.3<br>(1.31) | 22.1<br>(2.14) | 20.9<br>(1.37) | 0.2              |
| Edema in the plantar aponeurosis (y/n) | right | 0.07           | 0.06           | 0.09           | 0.11           | 0.12           | 0.9              |
|                                        | left  | 0              | 0              | 0              | 0.04           | 0              | n.a.             |
| Retrocalcaneal Bursa (y/n)             | right | 0.07           | 0.19           | 0.18           | 0.14           | 0.15           | 0.8              |
|                                        | left  | 0.03           | 0.21           | 0.24           | 0.18           | 0.12           | 0.3              |
| Subcutaneous edema (y/n)               | right | 0.05           | 0.64           | 0.65           | 0.79           | 0.81           | <b>&lt;0.001</b> |
|                                        | left  | 0.07           | 0.68           | 0.61           | 0.64           | 0.65           | <b>&lt;0.001</b> |

For peer review only

Table 2: Stated causes for abortion of the run in participating Athletes.

| <b>Athlete</b> | <b>Pathology</b>                                |
|----------------|-------------------------------------------------|
| 1              | Perimyositis of the thigh                       |
| 2              | Stress fracture of the tibia                    |
| 3              | Hallux valgus / bunion                          |
| 4              | Phlegmonia of the hand                          |
| 5              | Shin splint                                     |
| 6              | Perimyositis of the lower leg                   |
| 7              | Perimyositis of the thigh                       |
| 8              | Shin splint                                     |
| 9              | Perimyositis, gluteal and shin splint bilateral |
| 10             | Shin splint                                     |

## Legends

Figure 1: Measurements of MRI parameters on a sagittal STIR weighted MRI scan.

a)

PF: The measurement in the plantar fascia.

BE: Bone edema (in the medial cuneiform bone)

Short and long arrows pointing to measurements in the Achilles tendon (AT). The short arrow points to a intratendinous lesion near the insertion, the long arrow points to a innocuous area situated cranially.

b)

The measurement of the normally innocuous region of the calcaneus is placed between the most cranial portion of the posterior talocalcaneal facet and the most caudal point of the lateral process of the calcaneus (see arrows and round measurement site).

Figure 2: Subcutaneous edema on a sagittal STIR weighted MRI scan.

The six dates represent different MRI measurements of the same foot of one TEF09 participant, each with identical window settings.

The long diagonal arrow points to tubular high intensity structures, probably corresponding to peritendinous fluid.

The short arrow points to subcutaneous edema and edema in Kager's fat pad of the AT.

The translucent arrow points to intraosseous signal near the AT insertion evolving later than the subcutaneous edema.

Figure 3: Makeshift sandals.

Subcutaneous edema resulting in ankle (black arrow) and foot swelling (white arrows) necessitated cutting away parts of the shoes, creating makeshift sandals to accommodate the athletes' feet.

Figure 4: Intraosseous signal intensity in the time course of the TEF09.

Signal intensity measurements in the calcaneus at AT insertion (black triangles), in a normally innocuous area of the calcaneus (gray squares) and at the individual's area of the highest intraosseous signal (black dots) are shown together with the standard error values. The measurements were performed at several time points during the TEF09. The cumulative distance run is shown below the graph.

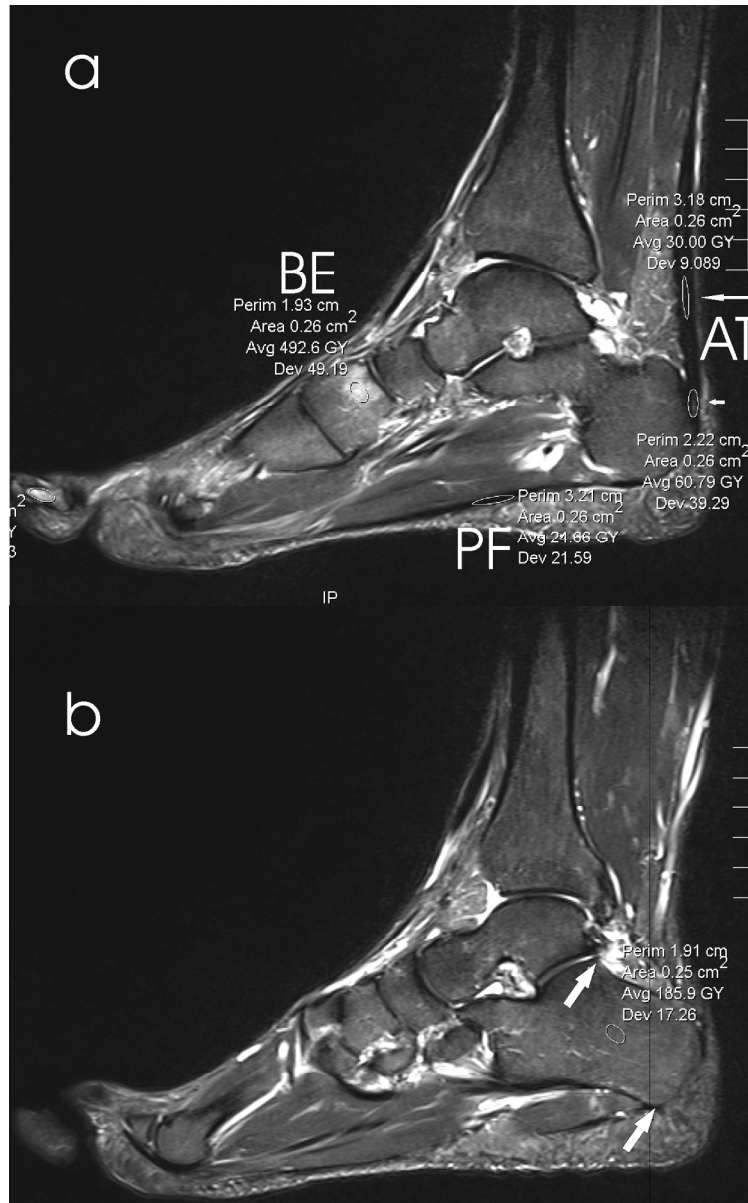

Figure 1: Measurements of MRI parameters on a sagittal STIR weighted MRI scan.

a)

PF: The measurement in the plantar fascia.

BE: Bone edema (in the medial cuneiform bone)

Short and long arrows pointing to measurements in the Achilles tendon (AT). The short arrow points to a intratendinous lesion near the insertion, the long arrow points to a innocuous area situated cranially.

b)

The measurement of the normally innocuous region of the calcaneus is placed between the most cranial portion of the posterior talocalcaneal facet and the most caudal point of the lateral process of the calcaneus (see arrows and round measurement site).

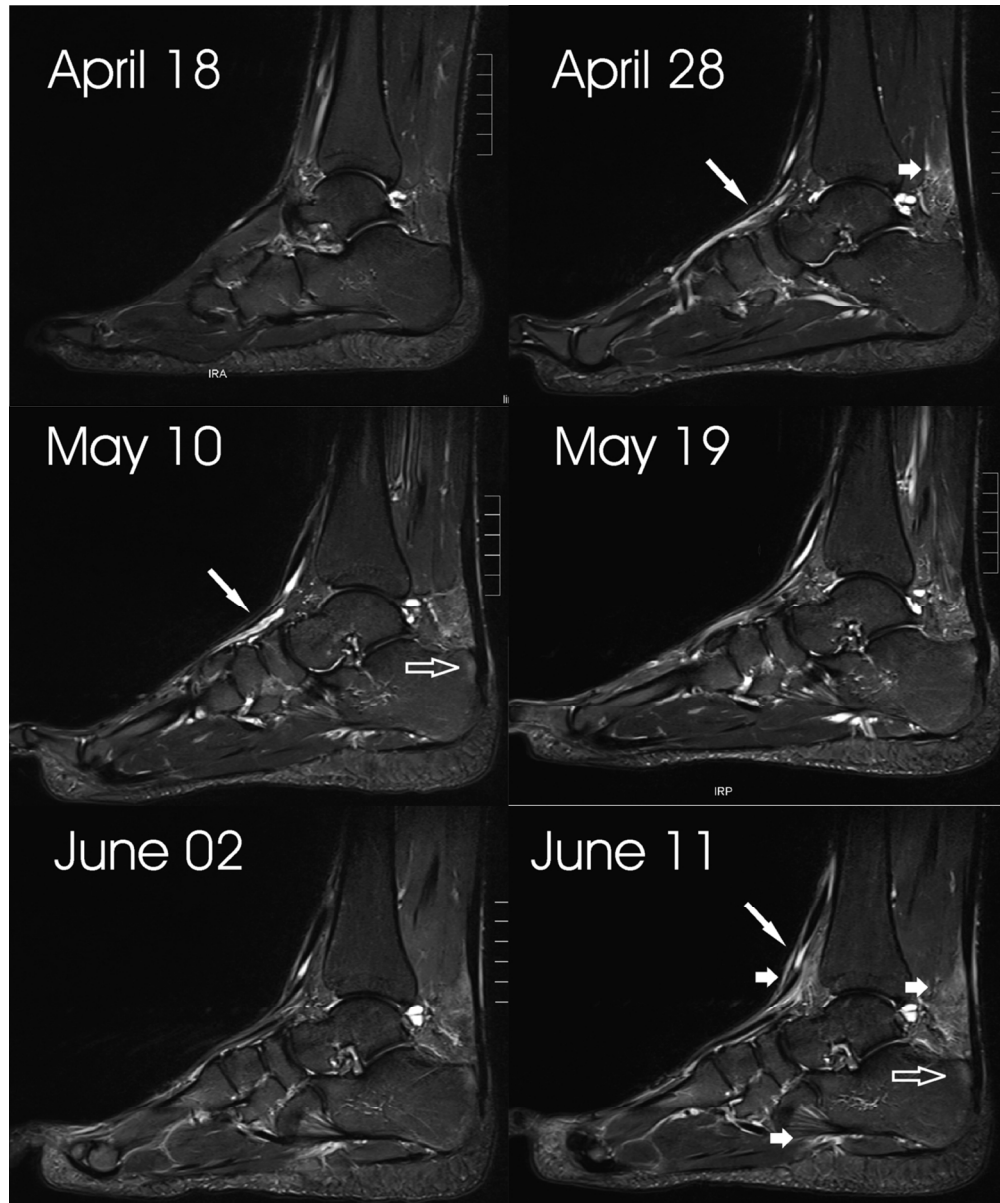

Figure 2: Subcutaneous edema on a sagittal STIR weighted MRI scan.

The six dates represent different MRI measurements of the same foot of one TEFRO9 participant, each with identical window settings.

The long diagonal arrow points to tubular high intensity structures, probably corresponding to peritendinous fluid.

The short arrow points to subcutaneous edema and edema in Kager's fat pad of the AT.

The translucent arrow points to intraosseous signal near the AT insertion evolving later than the subcutaneous edema.

114x137mm (300 x 300 DPI)



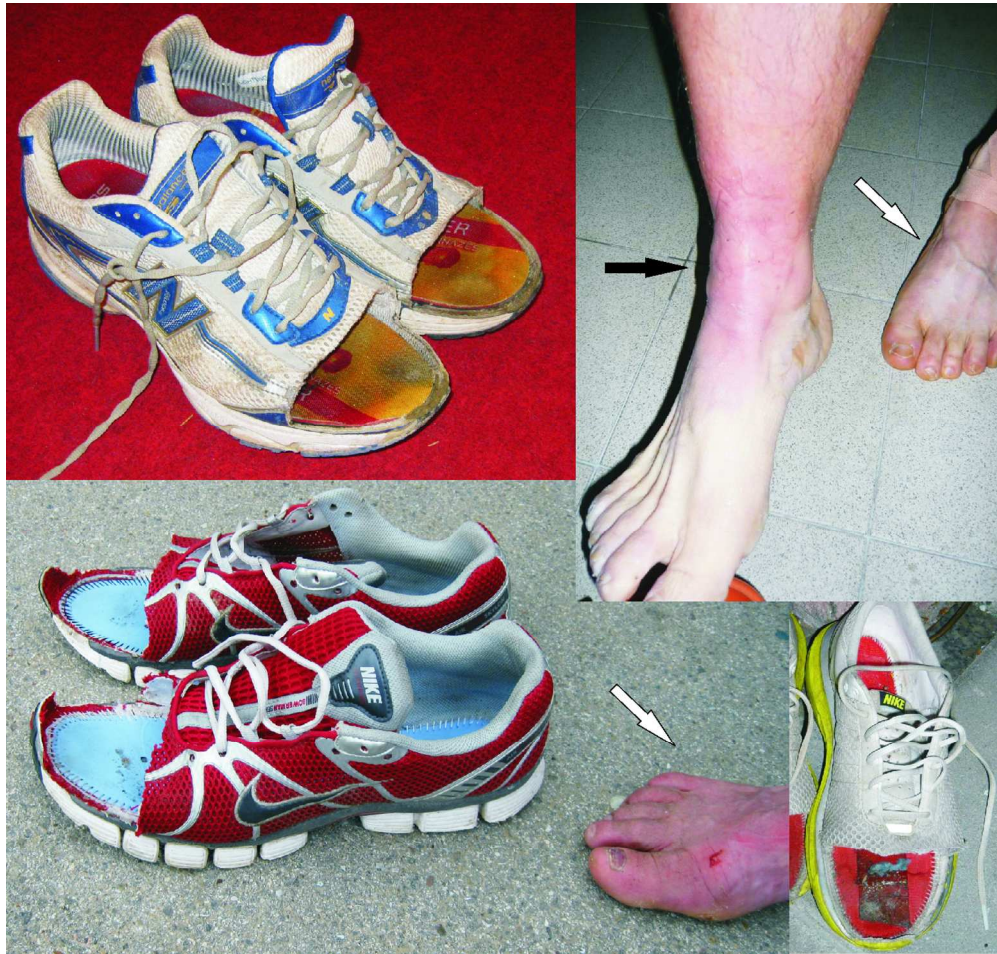

Figure 3: Makeshift sandals.

Subcutaneous edema resulting in ankle (black arrow) and foot swelling (white arrows) necessitated cutting away parts of the shoes, creating makeshift sandals to accommodate the athletes' feet.

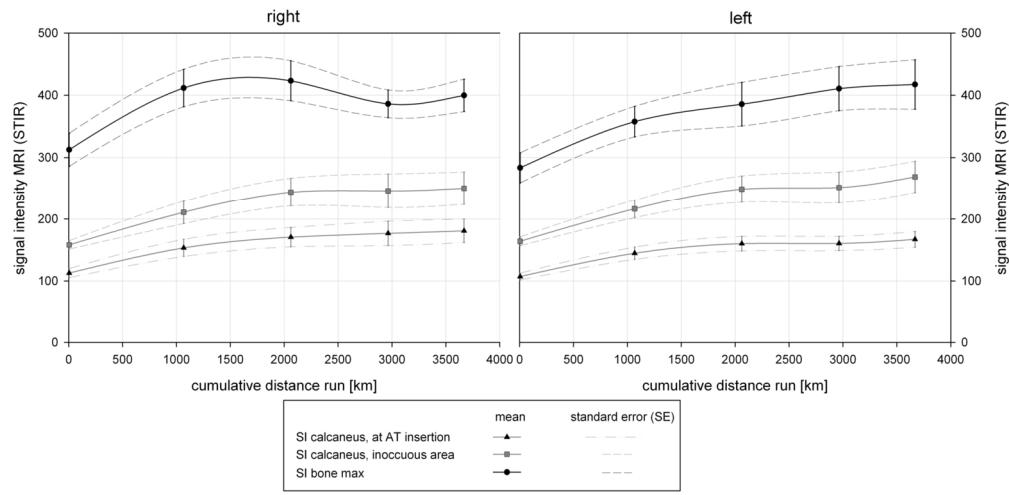

Figure 4: Figure 4: Intraosseous signal intensity in the time course of the TEFRO9.

Signal intensity measurements in the calcaneus at AT insertion (black triangles), in a normally innocuous area of the calcaneus (gray squares) and at the individual's area of the highest intraosseous signal (black dots) are shown together with the standard error values. The measurements were performed at several time points during the TEFRO9. The cumulative distance run is shown below the graph.

141x68mm (300 x 300 DPI)



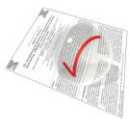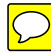

STROBE Statement—Items to be included when reporting observational studies in a conference abstract

| Item                | Recommendation                                                                                                                                                                                                                              |                 |
|---------------------|---------------------------------------------------------------------------------------------------------------------------------------------------------------------------------------------------------------------------------------------|-----------------|
| Title               | Indicate the study's design with a commonly used term in the title (e.g cohort, case-control, cross sectional)                                                                                                                              | <b>APPROVED</b> |
| Authors             | Contact details for the corresponding author                                                                                                                                                                                                | <b>APPROVED</b> |
| Study design        | Description of the study design (e.g cohort, case-control, cross sectional)                                                                                                                                                                 | <b>APPROVED</b> |
| Objective           | Specific objectives or hypothesis                                                                                                                                                                                                           | <b>APPROVED</b> |
| <b>Methods</b>      |                                                                                                                                                                                                                                             |                 |
| Setting             | Description of setting, follow-up dates or dates at which the outcome events occurred or at which the outcomes were present, as well as any points or ranges on other time scales for the outcomes (e.g., prevalence at age 18, 1998-2007). | <b>APPROVED</b> |
| Participants        | <i>Cohort study</i> —Give the most important eligibility criteria, and the most important sources and methods of selection of participants. Describe briefly the methods of follow-up                                                       | <b>APPROVED</b> |
|                     | <i>Case-control study</i> —Give the major eligibility criteria, and the major sources and methods of case ascertainment and control selection                                                                                               |                 |
|                     | <i>Cross-sectional study</i> —Give the eligibility criteria, and the major sources and methods of selection of participants                                                                                                                 |                 |
|                     | <i>Cohort study</i> —For matched studies, give matching and number of exposed and unexposed                                                                                                                                                 |                 |
|                     | <i>Case-control study</i> —For matched studies, give matching criteria and the number of controls per case                                                                                                                                  |                 |
| Variables           | Clearly define primary outcome for this report.                                                                                                                                                                                             | <b>APPROVED</b> |
| Statistical methods | Describe statistical methods, including those used to control for confounding                                                                                                                                                               | <b>APPROVED</b> |
| <b>Results</b>      |                                                                                                                                                                                                                                             |                 |
| Participants        | Report Number of participants at the beginning and end of the study                                                                                                                                                                         | <b>APPROVED</b> |
| Main results        | Report estimates of associations. If relevant, consider translating estimates of relative risk into absolute risk for a meaningful time period                                                                                              | <b>APPROVED</b> |
|                     | Report appropriate measures of variability and uncertainty (e.g., odds ratios with confidence intervals)                                                                                                                                    |                 |
| Conclusions         | General interpretation of study results                                                                                                                                                                                                     | <b>APPROVED</b> |

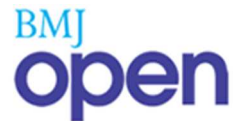

**The foot in multistage ultra marathon runners: Experience  
in a cohort study of 22 participants of the Trans Europe  
Footrace project with mobile MRI.**

|                                 |                                                                                                                                                                                                                                                                                                                          |
|---------------------------------|--------------------------------------------------------------------------------------------------------------------------------------------------------------------------------------------------------------------------------------------------------------------------------------------------------------------------|
| Journal:                        | <i>BMJ Open</i>                                                                                                                                                                                                                                                                                                          |
| Manuscript ID:                  | bmjopen-2012-001118.R1                                                                                                                                                                                                                                                                                                   |
| Article Type:                   | Research                                                                                                                                                                                                                                                                                                                 |
| Date Submitted by the Author:   | 17-Apr-2012                                                                                                                                                                                                                                                                                                              |
| Complete List of Authors:       | Freund, Wolfgang; University Hospitals Ulm, Diagnostic and Interventional Radiology<br>Weber, Frank; German Armed Forces Hospital, Neurology<br>Billich, Christian; University Hospitals Ulm, Diagnostic and Interventional Radiology<br>Schuetz, Uwe; University Hospitals Ulm, Diagnostic and Interventional Radiology |
| <b>Primary Subject Heading</b>: | Sports and exercise medicine                                                                                                                                                                                                                                                                                             |
| Secondary Subject Heading:      | Radiology and imaging                                                                                                                                                                                                                                                                                                    |
| Keywords:                       | Foot & ankle < ORTHOPAEDIC & TRAUMA SURGERY, Musculoskeletal disorders < ORTHOPAEDIC & TRAUMA SURGERY, Orthopaedic sports trauma < ORTHOPAEDIC & TRAUMA SURGERY, Magnetic resonance imaging < RADIOLOGY & IMAGING, SPORTS MEDICINE                                                                                       |
|                                 |                                                                                                                                                                                                                                                                                                                          |

SCHOLARONE™  
Manuscripts

only

1  
2  
3  
4  
5  
6  
7  
8  
9  
10  
11  
12  
13  
14  
15  
16  
17  
18  
19  
20  
21  
22  
23  
24  
25  
26  
27  
28  
29  
30  
31  
32  
33  
34  
35  
36  
37  
38  
39  
40  
41  
42  
43  
44  
45  
46  
47  
48  
49  
50  
51  
52  
53  
54  
55  
56  
57  
58  
59  
60

**The foot in multistage ultra marathon runners: Experience in a cohort study of 22 participants of the Trans Europe Footrace project with mobile MRI.**

Short title: MRI based observation for foot lesions during a multistage ultra marathon.

Wolfgang Freund MD<sup>1</sup>, Frank Weber MD<sup>2</sup>, Christian Billich MD<sup>1</sup>, Uwe H Schuetz MD<sup>1</sup>.

Affiliation:

<sup>1</sup>Department of Diagnostic and Interventional Radiology, University Hospitals, Ulm, Germany.

<sup>2</sup>German Armed Forces Hospital, Department of Neurology, Ulm, Germany.

Corresponding author:

PD Dr. Wolfgang Freund

Klinik für Diagnostische und Interventionelle Radiologie  
Universitätsklinik Ulm  
Steinhoevelstraße 9  
89075 Ulm  
Germany  
Fax: +49 731 50061002,  
or better by e-mail: freund-ulm@t-online.de

Keywords:

MRI, Achilles tendon, foot, ultra marathon, stress reaction.

Word count: 2703

## ABSTRACT

### Objectives

67 runners participated in the Trans Europe FootRace 2009 (TEFR09), a 4487 km (2789 mi) multi stage ultra marathon covering the south of Europe (Bari, Italy) to the North Cape. Reports on ultra marathons are lacking, but the literature reports overuse injuries in athletes, especially to the Achilles tendon (AT), ankle or hind foot. Bone edema may be related to exposure and is present in fatigue fractures. The aim of the study therefore was to determine prospectively if sustained maximal load during an ultra marathon leads to damage to the foot.

### Design and Participants

In a cohort study, repeated scanning of the 22 athletes participating in the study was performed before and during (approximately every 1000 km) the race. Using the obtained fat saturated inversion recovery sequence, two experienced readers blinded to the clinical data rated the images regarding foot lesions. Statistical analysis included regression analysis and computation of the interrater reliability.

### Setting

The TEFR09 course. MRI scanning was performed according to prearranged schedules for every participant, using a mobile 1.5 Tesla MRI unit on a trailer following the race.

### Primary outcome measures

MRI data such as AT diameter, bone or tendon lesions, subcutaneous, plantar fascia or intraosseous edema.

### Results

The 22 study participants did not differ significantly from the total of the 68 TEFR09 runners regarding height, weight and age.

The AT diameter increased significantly from 6.8 to 7.8 mm as did intraosseous signal, bone lesions and subcutaneous edema. However, finishers differed only regarding plantar aponeurosis and subcutaneous edema from participants aborting the TEFR09. Interrater reliability was 0.88-0.98.

### Conclusions

Under the extreme stress of the TEFR09, an increase of the AT diameter as well as bone signal are thought to be adaptive, since only subcutaneous edema and plantar fascia edema were related to abortion of the race.

**ARTICLE SUMMARY**

## Article focus:

- A study on effects of ultra marathon running, in this case the multi stage TransEurope FootRace covering 4487 km from Bari (Italy) to the North Cape.
- Observational cohort study using MRI to look for possible lesions to the foot.

## Key messages:

- During sustained maximal load, Achilles tendon diameter and bone MRI STIR signal (hinting at subtle edema) increases. This is thought to be adaptive.
- Subcutaneous edema and plantar fascia signal were related to abortion of the race. These measurements seem to be related to relevant changes leading to discontinuation of the run.
- No relevant new foot joint or tendon lesions were detected during the race over 4487 km.

## Strengths and limitations of this study:

- Repeated measurement prospectively during the run was possible only because of the mobile MRI unit used for this research project.
- The number of included runners (22) is high compared to other MRI based studies but may have been too small to detect less frequent lesions.

## INTRODUCTION

In 2009 (April 19th to June 21th) the TransEurope FootRace 2009 (TEFR09) took place. It was the second European transcontinental multistage ultra marathon race and covered the distance from the south of Italy (Bari) to the North Cape. A collective of 67 endurance runners with a mean age 50.5 years (range 26 to 74) and consisting of 11 women and 56 men from 12 nations met the challenge. Their goal was to run the 4,487 km in 64 days without any day rest. Thus they expected to complete an average distance of 70.1 km resp. 1.7 marathon distances (min 44 km, max 95.1 km) on every stage for 64 consecutive days.[1]

The permanent overuse during such an ultra marathon especially endangers ankle and foot. While reliable reports on ultra marathon effects are lacking, the present literature describes overuse injuries [2, 3] in endurance sport and shows the Achilles tendon (AT) to be a structure of high risk because it is regularly injured in sports.[4, 5] Also, ankle and hind foot injuries are frequent among athletes,[6, 7] with visible bone edema even in asymptomatic individuals increasing their exposure.[8] Other reports show high rates of fatigue fractures in army recruits after exerting marches.[9, 10] To diagnose these sport related injuries, MRI is the diagnostic procedure of choice.[11-13] In most reports, MRI was performed with sagittally oriented fat saturated T2 weighted sequences.[14]

The present study with serial MRI before and during the run was performed under the hypothesis that long distance endurance runners are able to endure the race associated injuries and the accompanying pain but will nevertheless show changes in Achilles tendon and bones of the foot. We expected the changes to accumulate during the run. Also we expected that bone marrow edema will increase during the run but decrease during pauses. Furthermore we expected that participants aborting the race will have more severe lesions on MRI. Finally we were looking for predictive parameters (risk factors) indicating failure to complete the run.

## PARTICIPANTS AND METHODS

### Study participants

After approval of the local ethics committee and in accordance to the Declaration of Helsinki, the participants of the TEFR ultra marathon were recruited for the MRI based cohort study. The inclusion criterion for the ultra marathon group obviously was participation in the event, exclusion criteria were contraindications against MRI. Since MRI scanning time and the athletes' time was limited, only a part of the examinations concerned the foot region. Of the 44 athletes consenting to participate in the MRI project, 22 were randomized into the foot study. Their data will be presented here.

### MRI acquisition

For each measurement, both feet were scanned consecutively with a dedicated foot coil that was table fixed with a boot-like design and 8-channel coils. MRI data were acquired with a mobile 1.5T MR scanner (Magnetom Avanto™ mobile MRI 02.05, software version: Syngo™ MR B15, Siemens Ltd., Erlangen, Germany) on a MRI-trailer travelling with the runners on the TEFR09 from stage to stage, day by day.

1  
2  
3  
4  
5  
6  
7 The MRI measurements were planned in a schedule for each participant, assuring  
8 equal distribution of measurements at all timepoints.

9 Every participant was scanned at a baseline time point 1 prior to the run and roughly  
10 every 1000 km or directly after abortion of the run. Schedules were made for time  
11 point 2 (day 17-22 at km 1131-1487), time point 3 (day 29-35 at km 1985- 2362), time  
12 point 4 (day 43-46 at km 2964-3161) and time point 5 (day 50 to 58 at km 3430-  
13 4037).

#### 14 **MRI sequences**

15 The imaging sequence used in the reported study was a fat saturated short tau  
16 inversion recovery (STIR) sagittal sequence, resulting in a T2-weighted fat  
17 suppressed image with edema or effusion showing as increased signal. Sequence  
18 parameters were:

19 Slice thickness of 2 mm, repetition time was 8490 ms, echo time 60 ms, inversion  
20 time 120 ms. Flip angle was 140°, echo train length 13, bandwidth 130 Hz/voxel, the  
21 matrix was 512x512 (interpolated from 358x358), field of view 300x300 mm and time  
22 of acquisition was 3min 50s for each side.

#### 23 **MRI data measurements**

24 Two researchers (experienced radiologists WF and US) without access to clinical  
25 data independently assessed the datasets at PACS workstations. All signal  
26 intensities were measured in a region of interest covering a volume of 25mm<sup>2</sup>.  
27 The measurements closely resemble the technique published earlier.[15]

28  
29 The following measurements (see also table 1) were made on the sagittal MRI  
30 images:

31 The greatest anteroposterior diameter of the Achilles tendon (AT) and AT signal  
32 intensity at insertion. Also, signal intensity at mid tendon or at site of lesion, if a lesion  
33 is visible, and lesion distance from AT insertion were taken. The number of new  
34 lesions in comparison to the preceding examination was counted.

35 The signal intensity of the calcaneus at AT insertion and at a normally innocuous  
36 area in the middle between most cranial point of the posterior talocalcaneal articular  
37 surface and the most caudal point of the lateral process of the calcaneus (see figure  
38 1) was measured.

39 The highest intraosseous signal intensity in any bone of the foot was taken.

40 The number of bone bruises / subchondral or osseous lesions was noted.

41 The signal intensity of fascia plantaris was rated, taking note if there was edema or  
42 effusion (yes/no).

43 Also a possible bursa retrocalcanealis greater than 2 mm sagittally was noted  
44 (yes/no).

45 Any soft tissue signal intensity indicative of fasciitis, peritendonitis, subcutaneous  
46 edema (see figure 2) was noted (yes/no).

#### 47 **Finisher status**

48 To allow discrimination between runners finishing the race and others aborting, their  
49 status F (finisher) or NF (non finisher) was recorded, also the stated cause (Table 2).

#### 50 **Time from finish of stage to MRI**

51 Since it was hypothesized that bone marrow edema will increase during the run and  
52 decrease during rest (presumably lying down), the time from finish of the daily run to  
53 MRI scanning was recorded. For non finishers the time point has not been recorded  
54  
55  
56  
57  
58  
59  
60

1  
2  
3  
4  
5  
6  
7 because they stayed at some checkpoint until transportation. Therefore, their last  
8 resting period was guessed to start at noon.  
9

### 10 **Interrater reliability**

11 Interrater reliability was calculated on two measurements where previous data [15]  
12 had demonstrated good reliability: AT diameter and intraosseous signal intensity of  
13 the calcaneus (this time at the clearly defined “innocuous” location described above).  
14

### 15 **Statistical analysis**

16 Data were analyzed using R, version 2.11.1, R Foundation for Statistical Computing,  
17 2010.[16] Given the longitudinal nature of the test data, specialised regression  
18 models (linear mixed effect models) were applied. The package “nlme” [17] was  
19 used.

20 Univariate and multivariate regression analyses were performed.

21 Results were significant when  $p < 0.05$ .

22 Taking into account the critique of Bland and Altman [18] concerning the correlation  
23 coefficient to calculate the interrater reliability, we decided to use lambda as  
24 proposed by Jepsen et. al.[19] Lambda can be calculated as follows:

$$25 \lambda = \frac{2 \cdot VAR_X - VAR_D}{2 \cdot VAR_X}$$

26  
27 VAR denotes the variance of the measurements X and D the difference of the  
28 measurements of the two raters. The interrater-reliability is rated as low for  $\lambda < 0.25$ .  
29 Values up to .5 are rated as fair, .5-.75 as moderate to good and  $\lambda > 0,75$   
30 demonstrates good to excellent reliability.[20]  
31

## 32 **RESULTS**

### 33 **Study participants**

34 The TEFR09 participants comprised 57 men and 11 women, aged 26 to 74 years  
35 with a mean of 50.5 and a standard deviation (SD) of 10.5 years. They had a body  
36 height of 1.75 m (SD .08) and weight of 70.6 kg (SD 9.5).

37 Out of the total, 22 participated in this experiment. 2 were female and 20 male with a  
38 mean age of 49.1 years (11.5) at the time of the first MRI scan. They were 1.74 m  
39 (.09) tall and weighed 70.9 kg (11.3). The differences of the biometric markers of our  
40 sample to the whole group were not significant (t-test  $p = 0.6 - 0.9$ ).

41 Exemplary measurements are shown in figure 1. The evolution of soft tissue and  
42 osseous edema is depicted in figure 2 and foot swelling as well as resulting shoe  
43 modifications are shown in figure 3.  
44

### 45 **MRI measurements**

46 The predefined parameters were taken on the MRI examinations. The resulting  
47 measurements are detailed in table 1. The evolution of intraosseous signal intensities  
48 is depicted in figure 4.  
49

50 **Table 1:** Measurements of MRI parameters and correlation with distance run  
51

### 52 **Time from stage finish to MRI examination**

53 There was no significant effect of the time elapsed between stage finish and  
54 scanning (i.e. the length of the resting period before the scan, spent lying down and  
55  
56  
57  
58  
59  
60



thus decreasing potential edema) on the measured MRI parameters to be found in univariate and multivariate regression analyses.

### Side differences

Looking for significant side differences in the observed measures, the following were found to be larger on the right side: Signal intensity of the AT at insertion ( $p=0.04$ ), the number of bone lesions (0.002), the signal intensity of the plantar aponeurosis (0.03). The distance to an AT lesion from the point of calcaneal insertion ( $p=0.04$ ) was larger on the left side.

### Differences between finishers and non finishers

21 athletes out of 67 participants had to exit the race. Out of the 22 participants in our study, 13 (59.1%) completed our study, while 12 finished the TEFRO9, and 10 aborted the run. The athlete who finished our study (participation in the MRI at time point 5) but had to abort the race afterwards because of a hand phlegmonia has been counted as not aborting for our study, since the cause for abortion was not related to a problem of the feet and the measurements are thought to be independent from the later evolution of a hand phlegmonia.

The rate of abortion didn't differ significantly between the total and our study participants. The stated causes are listed in table 2. Most of the problems occurred in the lower legs (shin splint and perimyositis).

F and NF showed significant differences at the beginning of the TEFRO9 only in the signal intensity of the plantar aponeurosis ( $p=0.03$ ).

During the run, there were significant differences in the evolution of edema of the right plantar aponeurosis ( $p=0.02$ ) and subcutaneous edema of the right (0.05) and left side (0.04), with NF showing higher rates of edema.

### Interrater reliability

The interrater reliability was calculated for the diameter of the AT as well as the Signal intensity of an innocuous region of the calcaneus. The lambda values were for AT diameter of the right /left side 0.95 / 0.88 and for the signal intensity of the normally innocuous region of the calcaneus on the right/ left side 0.97 / 0.98 respectively.

### DISCUSSION

The TEFRO9 participants had to endure an immense physical exposure, leading to stress fractures, swollen feet, sometimes necessitating cutting away part of the running shoe in order to continue running,[1] but 46 out of 67 (68.7%) were able to finish. Our study participants showed changes during the run with an increase of the AT diameter and intraosseous signal intensity as well as subcutaneous edema. Non finishers displayed higher rates of soft tissue edema.

We had hypothesized that runners will show increasing pathology of hindfoot and ankle as well as AT during the run even if they are able to finish the TEFRO9.

The literature up to date had been inconclusive as to the consequences of marathon training, including our own data[15] that had shown little changes in MRI appearance of the hindfoot and AT during training and participation of a (half) marathon.

However, the TEFRO9 with extended running load over 64 stages without any day rest is not comparable to other sporting events or normal leisure activities.

The results show a gradual increase of the diameter of the AT from a mean of 6.8 to a mean of 7.8mm over the course of the run. This stands in contrast to reports linking

1  
2  
3  
4  
5  
6  
7 AT diameter to disease[21] or showing decrease of AT diameter with training.[22]  
8 However, the results match with previous data on runners[23] and healthy  
9 marathoners[15] or reports stressing the relevance of AT signal intensity SI[24] or  
10 calcaneus edema at tendon insertion[25] for pathology. No significant correlation  
11 could be shown to tendon signal intensity or lesions or calcaneus bone edema at  
12 tendon insertion, further strengthening the point that the observed AT changes seem  
13 to be adaptive.

14 Furthermore, gradual increases over the run in osseous signal of the calcaneus as  
15 well as the maximal intraosseous signal in any foot bone and the number of bone  
16 lesions could be shown (see figure 4).

17 The increased signal intensity draws attention to reports on stress fractures,[9, 10]  
18 but the appearance of the recorded alterations in our study occurred early and didn't  
19 coincide with stress fractures. Thus the signal increase is thought to result from  
20 stress response[12] as reported in asymptomatic runners.[8, 26-28] Sometimes  
21 diffuse bone edema in nearly all end phalanges pointed to contusions because of  
22 tight shoes. However, bone edema and lesions were not linked to abortion of the run  
23 (NF status).

24  
25 Also, increases in subcutaneous edema occurred over the course of the run (see  
26 figure 2). Here, subcutaneous edema at the time of the start of TEFR09 was rare with  
27 around 5% (see table 1), while it rose sharply at time point 2 (after a mean of  
28 1068km) to ca. 65% and increased only moderately to ca. 70% at time point 5 (after a  
29 mean of 3669km). This corresponds to the sometimes grotesque swelling of runners'  
30 feet, necessitating cutting of running shoes to resemble crude sandals (see figure 3).

31  
32 Increase of leg volume and ankle edema during prolonged exercise has been  
33 reported [29, 30] and has been attributed to endocrine dysregulation. However,  
34 recent studies postulate rather fluid overload as the source of the swellings [31, 32]  
35 and total body water increase has been shown [33] in long endurance athletes.

36  
37 We had hypothesized that bone edema and the corresponding SI would decrease  
38 during rest (lying down). However, our data showed no correlation of the resting time  
39 to the SI. So the observed bone edema seems to reflect true load effects and not  
40 simple hydrostatic changes.

41  
42 We had expected to see more severe lesions in NF than in F and had hoped to find  
43 risk factors or predictive parameters for NF. Here, significant differences could be  
44 shown only for soft tissue parameters: At the beginning of the TEFR09 only the SI of  
45 the left plantar aponeurosis was significantly higher in NF, pointing to possible  
46 overload even before the start. During the run, NF showed significantly more  
47 subcutaneous edema and edema of the (right) plantar aponeurosis. This may  
48 indicate that soft tissue edema is more relevant to the possible abortion of the run  
49 than the intraosseous changes described above or tendon problems. Especially the  
50 signal alterations in the plantar aponeurosis point to plantar fasciitis, a problem  
51 thought to be the main cause of inferior heel pain in runners and is detected easily by  
52 MRI.[34]

53 Considering clinical data on abortion of the run (see table 2), the stated soft-tissue  
54 related causes refer mainly to the legs (mostly shin splint and perimyositis). These  
55 regions were not included in the current investigation. However, it is probable that  
56 edema related to shin splint or perimyositis had spread along the lower legs to the  
57  
58  
59  
60

1  
2  
3  
4  
5  
6  
7 foot, so that the visible subcutaneous edema was not directly related to a pathology  
8 in the foot.

9  
10 With lambda values between 0.88 and 0.98, the interrater reliability can be rated as  
11 excellent.[20]

12 **Limitations Strengths, limitations and implications for future research:**

13 This is the first study in history to report results from close observation of multi stage  
14 ultra marathon athletes by mobile MRI. Therefore it is the first study to report  
15 changes in the musculoskeletal system in multi stage ultramarathoners. The chance  
16 to observe an event like the TEFRO9 with a mobile MRI scanner had been great, but  
17 the difficulties of tight schedules of the athletes prohibited greater numbers.  
18 Poor infrastructure and difficult local situations at the stage destinations sometimes  
19 made a nearby commissioning of the mobile MRI impossible. However, the strongest  
20 influence forcing the staff to change and adapt their research work daily, was the  
21 athlete himself, with his individual personality and more or less daily changing mental  
22 and physical condition and necessities: pain, injuries, fatigue, fears, doubts, illness,  
23 regeneration program and nutrition plan.

24 The stated radiological findings like subcutaneous or intraosseous edema are  
25 important. Lacking additional data, our study can not prove the cause for it (workload,  
26 endocrine imbalance or fluid overload, as discussed above). Therefore, additional  
27 data like fluid intake, electrolyte content of plasma and urine as well as hormonal  
28 factors should be sampled in future studies.

29 The inclusion of 22 runners permitted detailed examinations but the number may  
30 have been too small to detect factors distinguishing NF. However, the study sample  
31 of 22 athletes had been randomized out of all participants, their biometric data shows  
32 that they are representative of the whole group of TEFRO9 participants. So their  
33 results may be generalized.

34  
35  
36 **Concluding:**

37 During the TEFRO9 and under extreme stress, adaptive changes like the increase of  
38 the AT diameter could be detected with MRI as well as signs of soft tissue overload  
39 with swelling and edema. The meaning of the SI increase of the foot bones is thought  
40 to resemble a stress response, but is not correlated to abortion of the race or  
41 development of stress fractures during the observed transcontinental multistage  
42 ultramarathon.

43  
44  
45 **Competing interests**

46 None.

47  
48 **Trial registration**

49 University of Ulm, Germany Ethics Committee Nr. 78/08-UBB/se.

50  
51 **Funding statement**

52 This project was mainly supported by the German Research Association (DFG:  
53 "Deutsche Forschungsgemeinschaft"), under grants SCHU 2514/1-1 and SCHU  
54 2514/1-2. Other non-public funds were received from Siemens medical and the  
55 Medical Faculty of the University of Ulm. All funding was unrestricted. None of the  
56  
57  
58  
59  
60

funding bodies had any role in the study design, data collection, data analysis, data interpretation, manuscript preparation or decision to publish.

### Data sharing statement

No additional data available.

### REFERENCES

1. Schulze I. TransEurope-FootRace 2009. Bari-Nordkap - 4.487,7 km in 64 Tagesetappen. Leipzig, Germany: Engelsdorfer Verlag; 2010.
2. Wilder RP, Sethi S. Overuse injuries: tendinopathies, stress fractures, compartment syndrome, and shin splints. *Clin Sports Med.* 2004;**23**(1):55-81,vi.
3. Koh ES, Lee JC, Healy JC. MRI of overuse injury in elite athletes. *Clin Radiol.* 2007;**62**(11):1036-43.
4. Reiter M, Ulreich N, Dirisamer A, et al. [Extended field-of-view sonography in Achilles tendon disease: a comparison with MR imaging]. *Fortschr Roentgenstr.* 2004;**176**(5):704-8.
5. Bleakney RR, White LM. Imaging of the Achilles tendon. *Foot Ankle Clin.* 2005;**10**(2):239-54.
6. Sijbrandij ES, van Gils AP, de Lange EE. Overuse and sports-related injuries of the ankle and hind foot: MR imaging findings. *Eur J Radiol.* 2002;**43**(1):45-56.
7. Haverstock BD. Foot and ankle imaging in the athlete. *Clin Podiatr Med Surg.* 2008;**25**(2):249-62, vi-vii.
8. Trappeniers L, De Maeseneer M, De Ridder F, et al. Can bone marrow edema be seen on STIR images of the ankle and foot after 1 week of running? *Eur J Radiol.* 2003;**47**(1):25-8.
9. Jones BH, Harris JM, Vinh TN, et al. Exercise-induced stress fractures and stress reactions of bone: epidemiology, etiology, and classification. *Exerc Sport Sci Rev.* 1989;**17**:379-422.
10. Milgrom C, Giladi M, Stein M, et al. Stress fractures in military recruits. A prospective study showing an unusually high incidence. *J Bone Joint Surg Br.* 1985;**67**(5):732-5.
11. Shalabi A, Svensson L, Kristoffersen-Wiberg M, et al. Tendon injury and repair after core biopsies in chronic Achilles tendinosis evaluated by serial magnetic resonance imaging. *Br J Sports Med.* 2004;**38**(5):606-12.
12. Rosenberg ZS, Beltran J, Bencardino JT. From the RSNA Refresher Courses. Radiological Society of North America. MR imaging of the ankle and foot. *Radiographics.* 2000;**20**:S153-79.
13. Collins MS. Imaging evaluation of chronic ankle and hindfoot pain in athletes. *Magn Reson Imaging Clin N Am.* 2008;**16**(1):39-58,v-vi.
14. Campbell SE. MRI of sports injuries of the ankle. *Clin Sports Med.* 2006;**25**(4):727-62.
15. Freund W, Billich C, Brambs HJ, et al. [MRI Changes of Achilles Tendon and Hindfoot in Experienced Runners and Beginners during Training and after a (Half)-Marathon Competition.]. *Z Orthop Unfall.* 2011;**149**(4):407-17.
16. R\_Development\_Core\_Team. R: A language and environment for statistical computing. 2.11.1 ed. Vienna: R Foundation for Statistical Computing; 2010.
17. Pinheiro J, Bates D, DebRoy S, et al. nlme: Linear and Nonlinear Mixed Effects Models. R package version 3.1-86. In: Team tRDC, editor. 3.1-86 ed. Vienna: R Foundation for Statistical Computing; 2007.

Formatted: German (Germany)

Formatted: Dutch (Netherlands)

Formatted: Danish

Formatted: Norwegian (Bokmål)

1  
2  
3  
4  
5  
6  
7  
8  
9  
10  
11  
12  
13  
14  
15  
16  
17  
18  
19  
20  
21  
22  
23  
24  
25  
26  
27  
28  
29  
30  
31  
32  
33  
34  
35  
36  
37  
38  
39  
40  
41  
42  
43  
44  
45  
46  
47  
48  
49  
50  
51  
52  
53  
54  
55  
56  
57  
58  
59  
60

18. Bland JM, Altman DG. Statistical methods for assessing agreement between two methods of clinical measurement. *Lancet*. 1986;**1**(8476):307-10.
19. Jepsen JR, Laursen LH, Hagert CG, et al. Diagnostic accuracy of the neurological upper limb examination I: inter-rater reproducibility of selected findings and patterns. *BMC Neurol*. 2006;**6**:8.
20. Portney LG, Watkins MP. Correlations. Foundations of clinical research: Applications to practice. Upper Saddle River: Prentice Hall Health; 2000. p. 491-508.
21. Nicholson CW, Berlet GC, Lee TH. Prediction of the success of nonoperative treatment of insertional Achilles tendinosis based on MRI. *Foot Ankle Int*. 2007;**28**(4):472-7.
22. Ohberg L, Lorentzon R, Alfredson H. Eccentric training in patients with chronic Achilles tendinosis: normalised tendon structure and decreased thickness at follow up. *Br J Sports Med*. 2004;**38**(1):8-11.
23. Kongsgaard M, Aagaard P, Kjaer M, et al. Structural Achilles tendon properties in athletes subjected to different exercise modes and in Achilles tendon rupture patients. *J Appl Physiol*. 2005;**99**(5):1965-71. Epub 2005/08/06.
24. Gardin A, Bruno J, Movin T, et al. Magnetic resonance signal, rather than tendon volume, correlates to pain and functional impairment in chronic Achilles tendinopathy. *Acta Radiol*. 2006;**47**(7):718-24.
25. Haims AH, Schweitzer ME, Patel RS, et al. MR imaging of the Achilles tendon: overlap of findings in symptomatic and asymptomatic individuals. *Skeletal Radiol*. 2000;**29**(11):640-5.
26. Lohman M, Kivisaari A, Vehmas T, et al. MRI abnormalities of foot and ankle in asymptomatic, physically active individuals. *Skeletal Radiol*. 2001;**30**(2):61-6.
27. Lazzarini KM, Troiano RN, Smith RC. Can running cause the appearance of marrow edema on MR images of the foot and ankle? *Radiology*. 1997;**202**(2):540-2.
28. Schweitzer ME, White LM. Does altered biomechanics cause marrow edema? *Radiology*. 1996;**198**(3):851-3.
29. Milledge JS, Bryson EI, Catley DM, et al. Sodium balance, fluid homeostasis and the renin-aldosterone system during the prolonged exercise of hill walking. *Clin Sci (Lond)*. 1982;**62**(6):595-604. Epub 1982/06/01.
30. Williams ES, Ward MP, Milledge JS, et al. Effect of the exercise of seven consecutive days hill-walking on fluid homeostasis. *Clin Sci (Lond)*. 1979;**56**(4):305-16. Epub 1979/04/01.
31. Knechtle B, Knechtle P, Kohler G, et al. The recovery phase following a Triple Iron triathlon *The Journal of Human Kinetics*. 2009;**21**:65-74.
32. Bracher A, Knechtle B, Gnadinger M, et al. Fluid intake and changes in limb volumes in male ultra-marathoners: does fluid overload lead to peripheral oedema? *Eur J Appl Physiol*. 2012;**112**(3):991-1003. Epub 2011/07/02.
33. Knechtle B, Salas Fraire O, Andonie JL, et al. Effect of a multistage ultra-endurance triathlon on body composition: World Challenge Deca Iron Triathlon 2006. *Br J Sports Med*. 2008;**42**(2):121-5; discussion 5. Epub 2007/07/03.
34. Grasel RP, Schweitzer ME, Kovalovich AM, et al. MR imaging of plantar fasciitis: edema, tears, and occult marrow abnormalities correlated with outcome. *AJR Am J Roentgenol*. 1999;**173**(3):699-701. Epub 1999/09/02.

Formatted: French (France)

Formatted: German (Germany)

1  
2  
3  
4  
5  
6  
7 Contributorship

8 WF designed the study, read the images and planned the statistical analysis. He  
9 wrote the manuscript and approved the final manuscript.

10 US designed the study, acquired the MRI data, read the images and critically revised  
11 the manuscript and approved the final manuscript.

12 FW designed and performed the statistical analysis. He wrote parts of the manuscript  
13 and approved the final manuscript.

14 CB designed the study, acquired the MRI data and critically revised the manuscript  
15 and approved the final manuscript.

16 Also, MRI scanning was performed by Heike Wiedelbach.  
17  
18  
19  
20  
21  
22  
23  
24  
25  
26  
27  
28  
29  
30  
31  
32  
33  
34  
35  
36  
37  
38  
39  
40  
41  
42  
43  
44  
45  
46  
47  
48  
49  
50  
51  
52  
53  
54  
55  
56  
57  
58  
59  
60



## Tables

Table 1: Measurements of MRI parameters and correlation with distance run. For quantitative data the mean (with standard error SE) is given, for qualitative data the percentage of positive measurements (mean over both readers). Correlation with distance run: P is calculated by a univariate regression model with the parameter in question as the dependent variable and total distance as the independent variable. Statistically significant correlations are in bold script.

| time point                                        |       | 1             | 2             | 3             | 4             | 5             | correlation with distance run |
|---------------------------------------------------|-------|---------------|---------------|---------------|---------------|---------------|-------------------------------|
| Parameter                                         | side  |               |               |               |               |               |                               |
| mean days run                                     |       | 0.1           | 15.5          | 29.1          | 42.8          | 52.5          |                               |
| mean distance run, in km (in miles)               |       | 5 (3.2)       | 1068 (664)    | 2062 (1282)   | 2964 (1842)   | 3669 (2280)   |                               |
| AT diameter (SE)                                  | right | 6.8 (0.37)    | 7.2 (0.44)    | 7.6 (0.54)    | 7.8 (0.53)    | 7.8 (0.55)    | <b>&lt;0.001</b>              |
|                                                   | left  | 6.8 (0.39)    | 7.3 (0.49)    | 7.6 (0.53)    | 7.7 (0.60)    | 7.8 (0.66)    | <b>&lt;0.001</b>              |
| SI at insertion of AT                             | right | 32.4 (3.96)   | 38.5 (5.39)   | 40.0 (6.49)   | 42.1 (7.08)   | 39.2 (7.43)   | 0.6                           |
|                                                   | left  | 30.4 (1.80)   | 31.8 (2.72)   | 28.5 (1.50)   | 32.2 (2.37)   | 29.5 (1.77)   | 0.5                           |
| SI in the middle of the AT                        | right | 35.9 (2.72)   | 42.9 (6.03)   | 45.5 (4.94)   | 42.2 (6.52)   | 47.9 (8.97)   | 0.05                          |
|                                                   | left  | 38.3 (3.92)   | 41.1 (5.28)   | 36.4 (3.06)   | 36.7 (3.80)   | 34.1 (5.42)   | 0.7                           |
| New lesions in the AT                             | right | NA            | 0.06          | 0.15          | 0             | 0             | 0.33                          |
|                                                   | left  | NA            | 0.03          | 0             | 0.09          | 0             | 0.7                           |
| Distance of the lesion to the insertion of the AT | right | 12.7 (4.02)   | 15.6 (5.19)   | 16.5 (3.52)   | 15.8 (4.23)   | 11.9 (6.03)   |                               |
|                                                   | left  | 21.8 (4.57)   | 21.5 (2.50)   | 26.2 (6.19)   | 24 (6.03)     | 19            |                               |
| SI in the calcaneus at the AT insertion           | right | 112.8 (7.30)  | 153.3 (13.80) | 170.6 (15.66) | 176.8 (19.66) | 180.1 (18.97) | <b>&lt;0.001</b>              |
|                                                   | left  | 107.2 (5.38)  | 144.7 (9.90)  | 160.2 (11.70) | 160.5 (11.54) | 167.0 (12.65) | <b>&lt;0.001</b>              |
| SI in an innocuous area of the calcaneus          | right | 158.2 (6.78)  | 210.8 (18.25) | 243.9 (22.59) | 246.1 (27.49) | 250.2 (26.43) | <b>&lt;0.001</b>              |
|                                                   | left  | 164.0 (7.20)  | 216.4 (14.38) | 248.8 (21.45) | 251.5 (25.1)  | 268.6 (25.33) | <b>&lt;0.001</b>              |
| Maximal SI in any bone                            | right | 312.5 (26.58) | 411.7 (30.17) | 423.3 (32.14) | 386.2 (22.29) | 399.9 (26.10) | <b>0.003</b>                  |
|                                                   | left  | 283.4 (24.29) | 357.7 (24.59) | 385.8 (35.06) | 410.7 (35.43) | 417.3 (39.79) | <b>&lt;0.001</b>              |
| Number of bone lesions                            | right | 2.1 (0.6)     | 3.2 (0.62)    | 3.5 (0.58)    | 3.2 (0.59)    | 3.6 (0.61)    | <b>0.016</b>                  |
|                                                   | left  | 2.3 (0.44)    | 2.4 (0.43)    | 2.3 (0.45)    | 3.1 (0.54)    | 3.2 (0.55)    | <b>0.002</b>                  |
| SI in the plantar aponeurosis                     | right | 25.4          | 28            | 27.9          | 33.7          | 34.8          | 0.4                           |



|                                        |       |                |                |                |                |                |                  |
|----------------------------------------|-------|----------------|----------------|----------------|----------------|----------------|------------------|
|                                        |       | (4.95)         | (5.79)         | (6.59)         | (8.86)         | (9.54)         |                  |
|                                        | left  | 21.4<br>(1.31) | 22.4<br>(1.29) | 22.3<br>(1.31) | 22.1<br>(2.14) | 20.9<br>(1.37) | 0.2              |
| Edema in the plantar aponeurosis (y/n) | right | 0.07           | 0.06           | 0.09           | 0.11           | 0.12           | 0.9              |
|                                        | left  | 0              | 0              | 0              | 0.04           | 0              | n.a.             |
| Retrocalcaneal Bursa (y/n)             | right | 0.07           | 0.19           | 0.18           | 0.14           | 0.15           | 0.8              |
|                                        | left  | 0.03           | 0.21           | 0.24           | 0.18           | 0.12           | 0.3              |
| Subcutaneous edema (y/n)               | right | 0.05           | 0.64           | 0.65           | 0.79           | 0.81           | <b>&lt;0.001</b> |
|                                        | left  | 0.07           | 0.68           | 0.61           | 0.64           | 0.65           | <b>&lt;0.001</b> |

1  
2  
3  
4  
5  
6  
7  
8  
9  
10  
11  
12  
13  
14  
15  
16  
17  
18  
19  
20  
21  
22  
23  
24  
25  
26  
27  
28  
29  
30  
31  
32  
33  
34  
35  
36  
37  
38  
39  
40  
41  
42  
43  
44  
45  
46  
47  
48  
49  
50  
51  
52  
53  
54  
55  
56  
57  
58  
59  
60

Table 2: Stated causes for abortion of the run in participating Athletes.

| <b>Athlete</b> | <b>Pathology</b>                                |
|----------------|-------------------------------------------------|
| 1              | Perimyositis of the thigh                       |
| 2              | Stress fracture of the tibia                    |
| 3              | Hallux valgus / bunion                          |
| 4              | Phlegmonia of the hand                          |
| 5              | Shin splint                                     |
| 6              | Perimyositis of the lower leg                   |
| 7              | Perimyositis of the thigh                       |
| 8              | Shin splint                                     |
| 9              | Perimyositis, gluteal and shin splint bilateral |
| 10             | Shin splint                                     |

## Legends

Figure 1: Measurements of MRI parameters on a sagittal STIR weighted MRI scan.

a)

PF: The measurement in the plantar fascia.

BE: Bone edema (in the medial cuneiform bone)

Short and long arrows pointing to measurements in the Achilles tendon (AT). The short arrow points to a intratendinous lesion near the insertion, the long arrow points to a innocuous area situated cranially.

b)

The measurement of the normally innocuous region of the calcaneus is placed between the most cranial portion of the posterior talocalcaneal facet and the most caudal point of the lateral process of the calcaneus (see arrows and round measurement site).

Figure 2: Subcutaneous edema on a sagittal STIR weighted MRI scan.

The six dates represent different MRI measurements of the same foot of one TEF09 participant, each with identical window settings.

The long diagonal arrow points to tubular high intensity structures, probably corresponding to peritendinous fluid.

The short arrow points to subcutaneous edema and edema in Kager's fat pad of the AT.

The translucent arrow points to intraosseous signal near the AT insertion evolving later than the subcutaneous edema.

Figure 3: Makeshift sandals.

Subcutaneous edema resulting in ankle (black arrow) and foot swelling (white arrows) necessitated cutting away parts of the shoes, creating makeshift sandals to accommodate the athletes' feet.

Figure 4: Figure 4: Intraosseous signal intensity in the time course of the TEF09.

Signal intensity measurements in the calcaneus at AT insertion (black triangles), in a normally innocuous area of the calcaneus (gray squares) and at the individual's area of the highest intraosseous signal (black dots) are shown together with the standard error values. The measurements were performed at several time points during the TEF09. The cumulative distance run is shown below the graph.

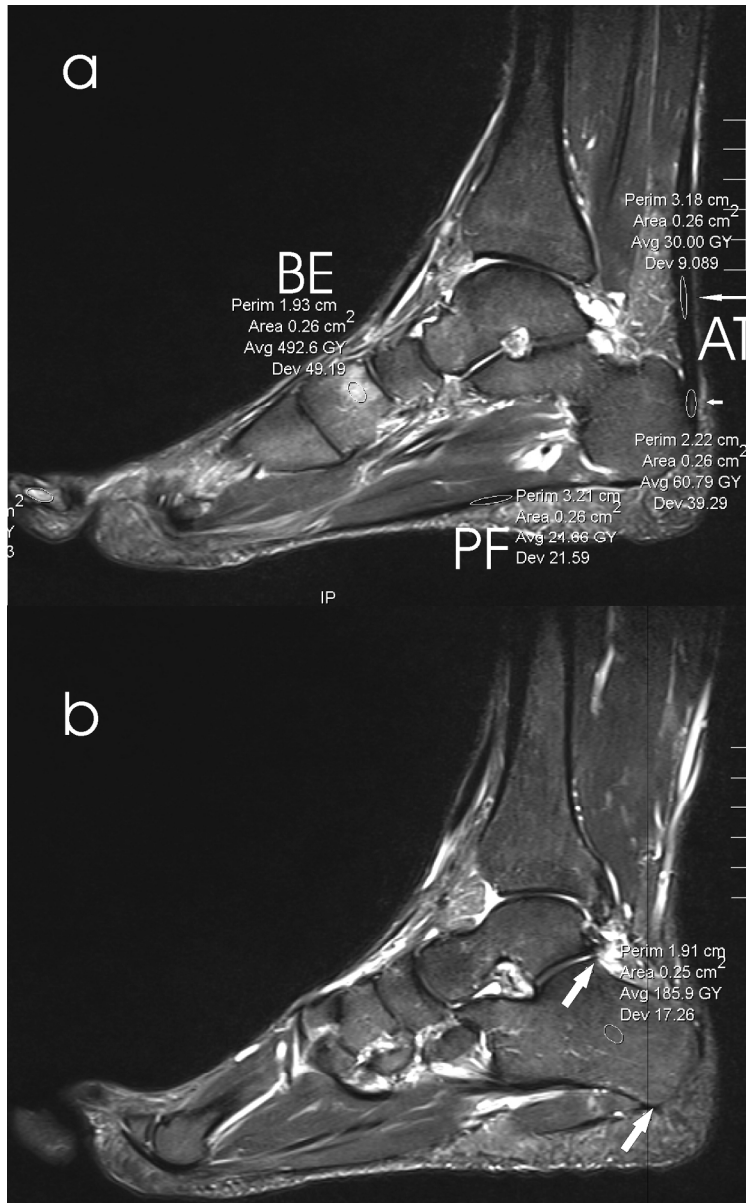

Figure 1: Measurements of MRI parameters on a sagittal STIR weighted MRI scan.

a)

PF: The measurement in the plantar fascia.

BE: Bone edema (in the medial cuneiform bone)

Short and long arrows pointing to measurements in the Achilles tendon (AT). The short arrow points to a intratendinous lesion near the insertion, the long arrow points to a innocuous area situated cranially.

b)

The measurement of the normally innocuous region of the calcaneus is placed between the most cranial portion of the posterior talocalcaneal facet and the most caudal point of the lateral process of the calcaneus (see arrows and round measurement site).



Figure 2: Subcutaneous edema on a sagittal STIR weighted MRI scan.

The six dates represent different MRI measurements of the same foot of one TEFRO9 participant, each with identical window settings.

The long diagonal arrow points to tubular high intensity structures, probably corresponding to peritendinous fluid.

The short arrow points to subcutaneous edema and edema in Kager's fat pad of the AT.

The translucent arrow points to intraosseous signal near the AT insertion evolving later than the subcutaneous edema.

114x137mm (300 x 300 DPI)

1  
2  
3  
4  
5  
6  
7  
8  
9  
10  
11  
12  
13  
14  
15  
16  
17  
18  
19  
20  
21  
22  
23  
24  
25  
26  
27  
28  
29  
30  
31  
32  
33  
34  
35  
36  
37  
38  
39  
40  
41  
42  
43  
44  
45  
46  
47  
48  
49  
50  
51  
52  
53  
54  
55  
56  
57  
58  
59  
60

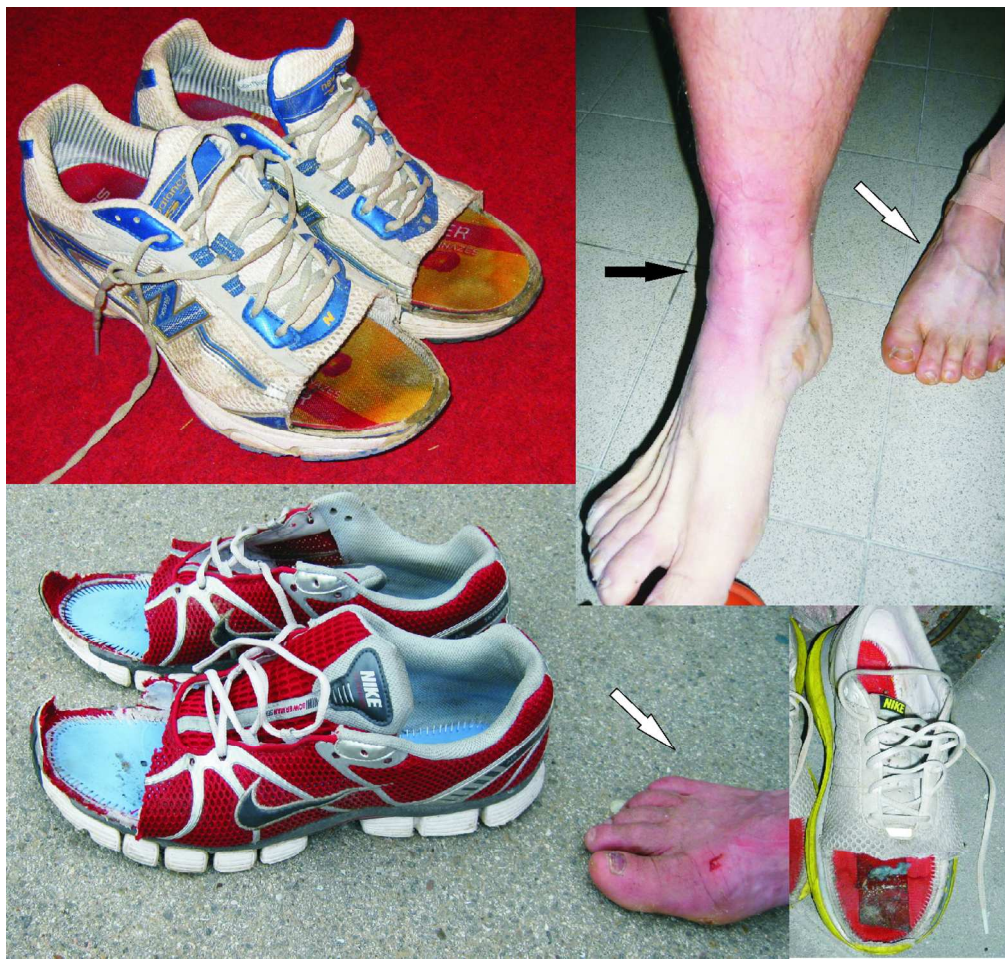

Figure 3: Makeshift sandals.  
Subcutaneous edema resulting in ankle (black arrow) and foot swelling (white arrows) necessitated cutting away parts of the shoes, creating makeshift sandals to accommodate the athletes' feet.

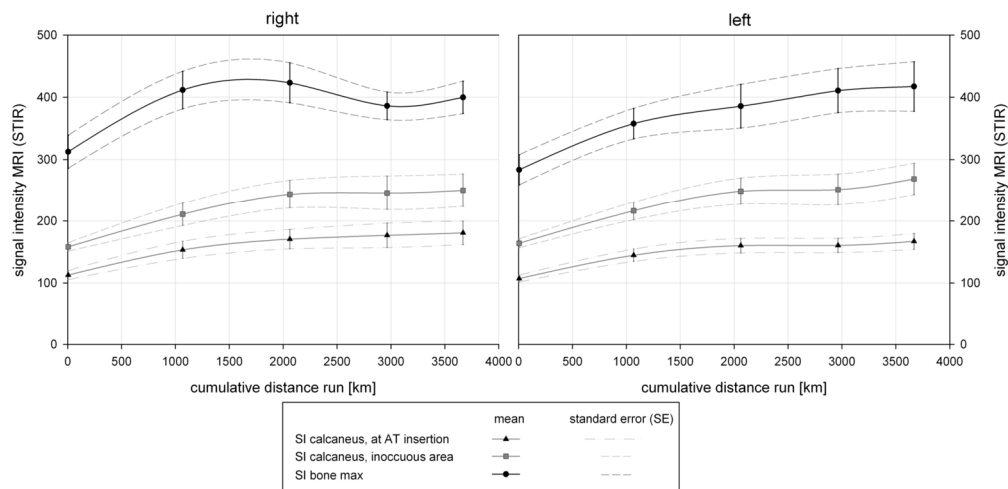

Figure 4: Figure 4: Intraosseous signal intensity in the time course of the TEFRO9.

Signal intensity measurements in the calcaneus at AT insertion (black triangles), in a normally innocuous area of the calcaneus (gray squares) and at the individual's area of the highest intraosseous signal (black dots) are shown together with the standard error values. The measurements were performed at several time points during the TEFRO9. The cumulative distance run is shown below the graph.

141x68mm (300 x 300 DPI)

review only



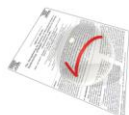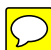

STROBE Statement—Items to be included when reporting observational studies in a conference abstract

| Item                | Recommendation                                                                                                                                                                                                                              |                 |
|---------------------|---------------------------------------------------------------------------------------------------------------------------------------------------------------------------------------------------------------------------------------------|-----------------|
| Title               | Indicate the study's design with a commonly used term in the title (e.g cohort, case-control, cross sectional)                                                                                                                              | <b>APPROVED</b> |
| Authors             | Contact details for the corresponding author                                                                                                                                                                                                | <b>APPROVED</b> |
| Study design        | Description of the study design (e.g cohort, case-control, cross sectional)                                                                                                                                                                 | <b>APPROVED</b> |
| Objective           | Specific objectives or hypothesis                                                                                                                                                                                                           | <b>APPROVED</b> |
| <b>Methods</b>      |                                                                                                                                                                                                                                             |                 |
| Setting             | Description of setting, follow-up dates or dates at which the outcome events occurred or at which the outcomes were present, as well as any points or ranges on other time scales for the outcomes (e.g., prevalence at age 18, 1998-2007). | <b>APPROVED</b> |
| Participants        | <i>Cohort study</i> —Give the most important eligibility criteria, and the most important sources and methods of selection of participants. Describe briefly the methods of follow-up                                                       | <b>APPROVED</b> |
|                     | <i>Case-control study</i> —Give the major eligibility criteria, and the major sources and methods of case ascertainment and control selection                                                                                               |                 |
|                     | <i>Cross-sectional study</i> —Give the eligibility criteria, and the major sources and methods of selection of participants                                                                                                                 |                 |
|                     | <i>Cohort study</i> —For matched studies, give matching and number of exposed and unexposed                                                                                                                                                 |                 |
|                     | <i>Case-control study</i> —For matched studies, give matching criteria and the number of controls per case                                                                                                                                  |                 |
| Variables           | Clearly define primary outcome for this report.                                                                                                                                                                                             | <b>APPROVED</b> |
| Statistical methods | Describe statistical methods, including those used to control for confounding                                                                                                                                                               | <b>APPROVED</b> |
| <b>Results</b>      |                                                                                                                                                                                                                                             |                 |
| Participants        | Report Number of participants at the beginning and end of the study                                                                                                                                                                         | <b>APPROVED</b> |
| Main results        | Report estimates of associations. If relevant, consider translating estimates of relative risk into absolute risk for a meaningful time period                                                                                              | <b>APPROVED</b> |
|                     | Report appropriate measures of variability and uncertainty (e.g., odds ratios with confidence intervals)                                                                                                                                    |                 |
| Conclusions         | General interpretation of study results                                                                                                                                                                                                     | <b>APPROVED</b> |



**The foot in multistage ultra marathon runners: Experience in a cohort study of 22 participants of the Trans Europe Footrace project with mobile MRI.**

|                                 |                                                                                                                                                                                                                                                                                                                          |
|---------------------------------|--------------------------------------------------------------------------------------------------------------------------------------------------------------------------------------------------------------------------------------------------------------------------------------------------------------------------|
| Journal:                        | <i>BMJ Open</i>                                                                                                                                                                                                                                                                                                          |
| Manuscript ID:                  | bmjopen-2012-001118.R2                                                                                                                                                                                                                                                                                                   |
| Article Type:                   | Research                                                                                                                                                                                                                                                                                                                 |
| Date Submitted by the Author:   | 23-Apr-2012                                                                                                                                                                                                                                                                                                              |
| Complete List of Authors:       | Freund, Wolfgang; University Hospitals Ulm, Diagnostic and Interventional Radiology<br>Weber, Frank; German Armed Forces Hospital, Neurology<br>Billich, Christian; University Hospitals Ulm, Diagnostic and Interventional Radiology<br>Schuetz, Uwe; University Hospitals Ulm, Diagnostic and Interventional Radiology |
| <b>Primary Subject Heading</b>: | Sports and exercise medicine                                                                                                                                                                                                                                                                                             |
| Secondary Subject Heading:      | Radiology and imaging                                                                                                                                                                                                                                                                                                    |
| Keywords:                       | Foot & ankle < ORTHOPAEDIC & TRAUMA SURGERY, Musculoskeletal disorders < ORTHOPAEDIC & TRAUMA SURGERY, Orthopaedic sports trauma < ORTHOPAEDIC & TRAUMA SURGERY, Magnetic resonance imaging < RADIOLOGY & IMAGING, SPORTS MEDICINE                                                                                       |
|                                 |                                                                                                                                                                                                                                                                                                                          |

SCHOLARONE™  
Manuscripts

only

1  
2  
3  
4  
5  
6  
7  
8  
9  
10  
11  
12  
13  
14  
15  
16  
17  
18  
19  
20  
21  
22  
23  
24  
25  
26  
27  
28  
29  
30  
31  
32  
33  
34  
35  
36  
37  
38  
39  
40  
41  
42  
43  
44  
45  
46  
47  
48  
49  
50  
51  
52  
53  
54  
55  
56  
57  
58  
59  
60

**The foot in multistage ultra marathon runners: Experience in a cohort study of 22 participants of the Trans Europe Footrace project with mobile MRI.**

Short title: MRI based observation for foot lesions during a multistage ultra marathon.

Wolfgang Freund MD<sup>1</sup>, Frank Weber MD<sup>2</sup>, Christian Billich MD<sup>1</sup>, Uwe H Schuetz MD<sup>1</sup>.

Affiliation:

<sup>1</sup>Department of Diagnostic and Interventional Radiology, University Hospitals, Ulm, Germany.

<sup>2</sup>German Armed Forces Hospital, Department of Neurology, Ulm, Germany.

Corresponding author:

PD Dr. Wolfgang Freund

Klinik für Diagnostische und Interventionelle Radiologie  
Universitätsklinik Ulm  
Steinhoevelstraße 9  
89075 Ulm  
Germany  
Fax: +49 731 50061002,  
or better by e-mail: freund-ulm@t-online.de

Keywords:

MRI, Achilles tendon, foot, ultra marathon, stress reaction.

| Word count: 27032913

## ABSTRACT

### Objectives

67 runners participated in the Trans Europe FootRace 2009 (TEFR09), a 4487 km (2789 mi) multi stage ultra marathon covering the south of Europe (Bari, Italy) to the North Cape. Reports on ultra marathons are lacking, but the literature reports overuse injuries in athletes, especially to the Achilles tendon (AT), ankle or hind foot. Bone edema may be related to exposure and is present in fatigue fractures. The aim of the study therefore was to determine prospectively if sustained maximal load during an ultra marathon leads to damage to the foot.

### Design and Participants

In a cohort study, repeated scanning of the 22 athletes participating in the study was performed before and during (approximately every 1000 km) the race. Using the obtained fat saturated inversion recovery sequence, two experienced readers blinded to the clinical data rated the images regarding foot lesions. Statistical analysis included regression analysis and computation of the interrater reliability.

### Setting

The TEFR09 course. MRI scanning was performed according to prearranged schedules for every participant, using a mobile 1.5 Tesla MRI unit on a trailer following the race.

### Primary outcome measures

MRI data such as AT diameter, bone or tendon lesions, subcutaneous, plantar fascia or intraosseous edema.

### Results

The 22 study participants did not differ significantly from the total of the 68 TEFR09 runners regarding height, weight and age.

The AT diameter increased significantly from 6.8 to 7.8 mm as did intraosseous signal, bone lesions and subcutaneous edema. However, finishers differed only regarding plantar aponeurosis and subcutaneous edema from participants aborting the TEFR09. Interrater reliability was 0.88-0.98.

### Conclusions

Under the extreme stress of the TEFR09, an increase of the AT diameter as well as bone signal are thought to be adaptive, since only subcutaneous edema and plantar fascia edema were related to abortion of the race.

**ARTICLE SUMMARY**

## Article focus:

- A study on effects of ultra marathon running, in this case the multi stage TransEurope FootRace covering 4487 km from Bari (Italy) to the North Cape.
- Observational cohort study using MRI to look for possible lesions to the foot.

## Key messages:

- During sustained maximal load, Achilles tendon diameter and bone MRI STIR signal (hinting at subtle edema) increases. This is thought to be adaptive.
- Subcutaneous edema and plantar fascia signal were related to abortion of the race. These measurements seem to be related to relevant changes leading to discontinuation of the run.
- No relevant new foot joint or tendon lesions were detected during the race over 4487 km.

## Strengths and limitations of this study:

- Repeated measurement prospectively during the run was possible only because of the mobile MRI unit used for this research project.
- The number of included runners (22) is high compared to other MRI based studies but may have been too small to detect less frequent lesions.

## INTRODUCTION

In 2009 (April 19th to June 21th) the TransEurope FootRace 2009 (TEFR09) took place. It was the second European transcontinental multistage ultra marathon race and covered the distance from the south of Italy (Bari) to the North Cape. A collective of 67 endurance runners with a mean age 50.5 years (range 26 to 74) and consisting of 11 women and 56 men from 12 nations met the challenge. Their goal was to run the 4,487 km in 64 days without any day rest. Thus they expected to complete an average distance of 70.1 km resp. 1.7 marathon distances (min 44 km, max 95.1 km) on every stage for 64 consecutive days.[1]

The permanent overuse during such an ultra marathon especially endangers ankle and foot. While reliable reports on ultra marathon effects are lacking, the present literature describes overuse injuries [2, 3] in endurance sport and shows the Achilles tendon (AT) to be a structure of high risk because it is regularly injured in sports.[4, 5] Also, ankle and hind foot injuries are frequent among athletes,[6, 7] with visible bone edema even in asymptomatic individuals increasing their exposure.[8] Other reports show high rates of fatigue fractures in army recruits after exerting marches.[9, 10] To diagnose these sport related injuries, MRI is the diagnostic procedure of choice.[11-13] In most reports, MRI was performed with sagittally oriented fat saturated T2 weighted sequences.[14]

The present study with serial MRI before and during the run was performed under the hypothesis that long distance endurance runners are able to endure the race associated injuries and the accompanying pain but will nevertheless show changes in Achilles tendon and bones of the foot. We expected the changes to accumulate during the run. Also we expected that bone marrow edema will increase during the run but decrease during pauses. Furthermore we expected that participants aborting the race will have more severe lesions on MRI. Finally we were looking for predictive parameters (risk factors) indicating failure to complete the run.

## PARTICIPANTS AND METHODS

### Study participants

After approval of the local ethics committee and in accordance to the Declaration of Helsinki, the participants of the TEFR ultra marathon were recruited for the MRI based cohort study. The inclusion criterion for the ultra marathon group obviously was participation in the event, exclusion criteria were contraindications against MRI. Since MRI scanning time and the athletes' time was limited, only a part of the examinations concerned the foot region. Of the 44 athletes consenting to participate in the MRI project, 22 were randomized into the foot study. Their data will be presented here.

### MRI acquisition

For each measurement, both feet were scanned consecutively with a dedicated foot coil that was table fixed with a boot-like design and 8-channel coils. MRI data were acquired with a mobile 1.5T MR scanner (Magnetom Avanto™ mobile MRI 02.05, software version: Syngo™ MR B15, Siemens Ltd., Erlangen, Germany) on a MRI-trailer travelling with the runners on the TEFR09 from stage to stage, day by day.

1  
2  
3  
4  
5  
6  
7  
8  
9  
10  
11  
12  
13  
14  
15  
16  
17  
18  
19  
20  
21  
22  
23  
24  
25  
26  
27  
28  
29  
30  
31  
32  
33  
34  
35  
36  
37  
38  
39  
40  
41  
42  
43  
44  
45  
46  
47  
48  
49  
50  
51  
52  
53  
54  
55  
56  
57  
58  
59  
60

The MRI measurements were planned in a schedule for each participant, assuring equal distribution of measurements at all timepoints.

Every participant was scanned at a baseline time point 1 prior to the run and roughly every 1000 km or directly after abortion of the run. Schedules were made for time point 2 (day 17-22 at km 1131-1487), time point 3 (day 29-35 at km 1985- 2362), time point 4 (day 43-46 at km 2964-3161) and time point 5 (day 50 to 58 at km 3430-4037).

### **MRI sequences**

The imaging sequence used in the reported study was a fat saturated short tau inversion recovery (STIR) sagittal sequence, resulting in a T2-weighted fat suppressed image with edema or effusion showing as increased signal. Sequence parameters were:

Slice thickness of 2 mm, repetition time was 8490 ms, echo time 60 ms, inversion time 120 ms. Flip angle was 140°, echo train length 13, bandwidth 130 Hz/voxel, the matrix was 512x512 (interpolated from 358x358), field of view 300x300 mm and time of acquisition was 3min 50s for each side.

### **MRI data measurements**

Two researchers (experienced radiologists WF and US) without access to clinical data independently assessed the datasets at PACS workstations. All signal intensities were measured in a region of interest covering a volume of 25mm<sup>2</sup>. The measurements closely resemble the technique published earlier.[15]

The following measurements (see also table 1) were made on the sagittal MRI images:

The greatest anteroposterior diameter of the Achilles tendon (AT) and AT signal intensity at insertion. Also, signal intensity at mid tendon or at site of lesion, if a lesion is visible, and lesion distance from AT insertion were taken. The number of new lesions in comparison to the preceding examination was counted.

The signal intensity of the calcaneus at AT insertion and at a normally innocuous area in the middle between most cranial point of the posterior talocalcaneal articular surface and the most caudal point of the lateral process of the calcaneus (see figure 1) was measured.

The highest intraosseous signal intensity in any bone of the foot was taken.

The number of bone bruises / subchondral or osseous lesions was noted.

The signal intensity of fascia plantaris was rated, taking note if there was edema or effusion (yes/no).

Also a possible bursa retrocalcanealis greater than 2 mm sagittally was noted (yes/no).

Any soft tissue signal intensity indicative of fasciitis, peritendonitis, subcutaneous edema (see figure 2) was noted (yes/no).

### **Finisher status**

To allow discrimination between runners finishing the race and others aborting, their status F (finisher) or NF (non finisher) was recorded, also the stated cause (Table 2).

### **Time from finish of stage to MRI**

Since it was hypothesized that bone marrow edema will increase during the run and decrease during rest (presumably lying down), the time from finish of the daily run to MRI scanning was recorded. For non finishers the time point has not been recorded



1  
2  
3  
4  
5  
6  
7 because they stayed at some checkpoint until transportation. Therefore, their last  
8 resting period was guessed to start at noon.  
9

### 10 **Interrater reliability**

11 Interrater reliability was calculated on two measurements where previous data [15]  
12 had demonstrated good reliability: AT diameter and intraosseous signal intensity of  
13 the calcaneus (this time at the clearly defined “innocuous” location described above).  
14

### 15 **Statistical analysis**

16 Data were analyzed using R, version 2.11.1, R Foundation for Statistical Computing,  
17 2010.[16] Given the longitudinal nature of the test data, specialised regression  
18 models (linear mixed effect models) were applied. The package “nlme” [17] was  
19 used.

20 Univariate and multivariate regression analyses were performed.

21 Results were significant when p was < 0.05.

22 Taking into account the critique of Bland and Altman [18] concerning the correlation  
23 coefficient to calculate the interrater reliability, we decided to use lambda as  
24 proposed by Jepsen et. al.[19] Lambda can be calculated as follows:

$$25 \lambda = \frac{2 \cdot VAR_X - VAR_D}{2 \cdot VAR_X}$$

26  
27 VAR denotes the variance of the measurements X and D the difference of the  
28 measurements of the two raters. The interrater-reliability is rated as low for  $\lambda < 0.25$ .  
29 Values up to .5 are rated as fair, .5-.75 as moderate to good and  $\lambda > 0,75$   
30 demonstrates good to excellent reliability.[20]  
31

## 32 **RESULTS**

### 33 **Study participants**

34 The TEFRO9 participants comprised 57 men and 11 women, aged 26 to 74 years  
35 with a mean of 50.5 and a standard deviation (SD) of 10.5 years. They had a body  
36 height of 1.75 m (SD .08) and weight of 70.6 kg (SD 9.5).

37 Out of the total, 22 participated in this experiment. 2 were female and 20 male with a  
38 mean age of 49.1 years (11.5) at the time of the first MRI scan. They were 1.74 m  
39 (.09) tall and weighed 70.9 kg (11.3). The differences of the biometric markers of our  
40 sample to the whole group were not significant (t-test p= 0.6 - 0.9).

41 Exemplary measurements are shown in figure 1. The evolution of soft tissue and  
42 osseous edema is depicted in figure 2 and foot swelling as well as resulting shoe  
43 modifications are shown in figure 3.  
44

### 45 **MRI measurements**

46 The predefined parameters were taken on the MRI examinations. The resulting  
47 measurements are detailed in table 1. The evolution of intraosseous signal intensities  
48 is depicted in figure 4.  
49

50 **Table 1:** Measurements of MRI parameters and correlation with distance run  
51

### 52 **Time from stage finish to MRI examination**

53 There was no significant effect of the time elapsed between stage finish and  
54 scanning (i.e. the length of the resting period before the scan, spent lying down and  
55  
56  
57  
58  
59  
60

1  
2  
3  
4  
5  
6  
7  
8  
9  
10  
11  
12  
13  
14  
15  
16  
17  
18  
19  
20  
21  
22  
23  
24  
25  
26  
27  
28  
29  
30  
31  
32  
33  
34  
35  
36  
37  
38  
39  
40  
41  
42  
43  
44  
45  
46  
47  
48  
49  
50  
51  
52  
53  
54  
55  
56  
57  
58  
59  
60

thus decreasing potential edema) on the measured MRI parameters to be found in univariate and multivariate regression analyses.

### Side differences

Looking for significant side differences in the observed measures, the following were found to be larger on the right side: Signal intensity of the AT at insertion ( $p=0.04$ ), the number of bone lesions (0.002), the signal intensity of the plantar aponeurosis (0.03). The distance to an AT lesion from the point of calcaneal insertion ( $p=0.04$ ) was larger on the left side.

### Differences between finishers and non finishers

21 athletes out of 67 participants had to exit the race. Out of the 22 participants in our study, 13 (59.1%) completed our study, while 12 finished the TEFRO9, and 10 aborted the run. The athlete who finished our study (participation in the MRI at time point 5) but had to abort the race afterwards because of a hand phlegmonia has been counted as not aborting for our study, since the cause for abortion was not related to a problem of the feet and the measurements are thought to be independent from the later evolution of a hand phlegmonia.

The rate of abortion didn't differ significantly between the total and our study participants. The stated causes are listed in table 2. Most of the problems occurred in the lower legs (shin splint and perimyositis).

F and NF showed significant differences at the beginning of the TEFRO9 only in the signal intensity of the plantar aponeurosis ( $p=0.03$ ).

During the run, there were significant differences in the evolution of edema of the right plantar aponeurosis ( $p=0.02$ ) and subcutaneous edema of the right (0.05) and left side (0.04), with NF showing higher rates of edema.

### Interrater reliability

The interrater reliability was calculated for the diameter of the AT as well as the Signal intensity of an innocuous region of the calcaneus. The lambda values were for AT diameter of the right /left side 0.95 / 0.88 and for the signal intensity of the normally innocuous region of the calcaneus on the right/ left side 0.97 / 0.98 respectively.

### DISCUSSION

The TEFRO9 participants had to endure an immense physical exposure, leading to stress fractures, swollen feet, sometimes necessitating cutting away part of the running shoe in order to continue running,[1] but 46 out of 67 (68.7%) were able to finish. Our study participants showed changes during the run with an increase of the AT diameter and intraosseous signal intensity as well as subcutaneous edema. Non finishers displayed higher rates of soft tissue edema.

We had hypothesized that runners will show increasing pathology of hindfoot and ankle as well as AT during the run even if they are able to finish the TEFRO9.

The literature up to date had been inconclusive as to the consequences of marathon training, including our own data[15] that had shown little changes in MRI appearance of the hindfoot and AT during training and participation of a (half) marathon.

However, the TEFRO9 with extended running load over 64 stages without any day rest is not comparable to other sporting events or normal leisure activities.

The results show a gradual increase of the diameter of the AT from a mean of 6.8 to a mean of 7.8mm over the course of the run. This stands in contrast to reports linking

1  
2  
3  
4  
5  
6  
7 AT diameter to disease[21] or showing decrease of AT diameter with training.[22]  
8 However, the results match with previous data on runners[23] and healthy  
9 marathoners[15] or reports stressing the relevance of AT signal intensity SI[24] or  
10 calcaneus edema at tendon insertion[25] for pathology. No significant correlation  
11 could be shown to tendon signal intensity or lesions or calcaneus bone edema at  
12 tendon insertion, further strengthening the point that the observed AT changes seem  
13 to be adaptive.

14 Furthermore, gradual increases over the run in osseous signal of the calcaneus as  
15 well as the maximal intraosseous signal in any foot bone and the number of bone  
16 lesions could be shown (see figure 4).

17 The increased signal intensity draws attention to reports on stress fractures,[9, 10]  
18 but the appearance of the recorded alterations in our study occurred early and didn't  
19 coincide with stress fractures. Thus the signal increase is thought to result from  
20 stress response[12] as reported in asymptomatic runners.[8, 26-28] Sometimes  
21 diffuse bone edema in nearly all end phalanges pointed to contusions because of  
22 tight shoes. However, bone edema and lesions were not linked to abortion of the run  
23 (NF status).

24  
25 Also, increases in subcutaneous edema occurred over the course of the run (see  
26 figure 2). Here, subcutaneous edema at the time of the start of TEFRO9 was rare with  
27 around 5% (see table 1), while it rose sharply at time point 2 (after a mean of  
28 1068km) to ca. 65% and increased only moderately to ca. 70% at time point 5 (after a  
29 mean of 3669km). This corresponds to the sometimes grotesque swelling of runners'  
30 feet, necessitating cutting of running shoes to resemble crude sandals (see figure 3).

31  
32 Increase of leg volume and ankle edema during prolonged exercise has been  
33 reported [29, 30] and has been attributed to endocrine dysregulation. However,  
34 recent studies postulate rather fluid overload as the source of the swellings [31, 32]  
35 and total body water increase has been shown [33] in long endurance athletes. Fluid  
36 intake had been shown to be positively correlated to the change of the volume of  
37 athletes' feet [34], furthermore, it has been shown that the total body water has  
38 increased over the course of multi stage runs [35, 36]. So it can be assumed that the  
39 subcutaneous edema is caused at least partially by excessive water intake.

40  
41 We had hypothesized that bone edema and the corresponding SI would decrease  
42 during rest (lying down). However, our data showed no correlation of the resting time  
43 to the SI. So the observed bone edema seems to reflect true load effects and not  
44 simple hydrostatic changes.

45  
46 We had expected to see more severe lesions in NF than in F and had hoped to find  
47 risk factors or predictive parameters for NF. Here, significant differences could be  
48 shown only for soft tissue parameters: At the beginning of the TEFRO9 only the SI of  
49 the left plantar aponeurosis was significantly higher in NF, pointing to possible  
50 overload even before the start. During the run, NF showed significantly more  
51 subcutaneous edema and edema of the (right) plantar aponeurosis. This may  
52 indicate that soft tissue edema is more relevant to the possible abortion of the run  
53 than the intraosseous changes described above or tendon problems. Especially the  
54 signal alterations in the plantar aponeurosis point to plantar fasciitis, a problem  
55 thought to be the main cause of inferior heel pain in runners and is detected easily by  
56 MRI.[37]  
57  
58  
59  
60

1  
2  
3  
4  
5  
6  
7 Considering clinical data on abortion of the run (see table 2), the stated soft-tissue  
8 related causes refer mainly to the legs (mostly shin splint and perimyositis). These  
9 regions were not included in the current investigation. However, it is probable that  
10 edema related to shin splint or perimyositis had spread along the lower legs to the  
11 foot, so that the visible subcutaneous edema was not directly related to a pathology  
12 in the foot.

13 With lambda values between 0.88 and 0.98, the interrater reliability can be rated as  
14 excellent.[20]  
15

16 **LimitationsStrengths, limitations and implications for future research:**

17 This is the first study in history to report results from close observation of multi stage  
18 ultra marathon athletes by mobile MRI. Therefore it is the first study to report  
19 changes in the musculoskeletal system in multi stage ultramarathoners. The chance

20 to observe an event like the TEFRO9 with a mobile MRI scanner had been great, but  
21 the difficulties of tight schedules of the athletes prohibited greater numbers.  
22 Poor infrastructure and difficult local situations at the stage destinations sometimes  
23 made a nearby commissioning of the mobile MRI impossible. However, the strongest  
24 influence forcing the staff to change and adapt their research work daily, was the  
25 athlete himself, with his individual personality and more or less daily changing mental  
26 and physical condition and necessities: pain, injuries, fatigue, fears, doubts, illness,  
27 regeneration program and nutrition plan.

28 The stated radiological findings like subcutaneous or intraosseous edema are  
29 important. Lacking additional data, our study can not prove the cause for it (workload,  
30 endocrine imbalance or fluid overload, as discussed above). Therefore, additional  
31 data like fluid intake, electrolyte content of plasma and urine as well as hormonal  
32 factors should be sampled in future studies.

33 The inclusion of 22 runners permitted detailed examinations but the number may  
34 have been too small to detect factors distinguishing NF. However, the study sample  
35 of 22 athletes had been randomized out of all participants, their biometric data shows  
36 that they are representative of the whole group of TEFRO9 participants. So their  
37 results may be generalized.  
38

39 **Concluding:**

40 During the TEFRO9 and under extreme stress, adaptive changes like the increase of  
41 the AT diameter could be detected with MRI as well as signs of soft tissue overload  
42 with swelling and edema. The meaning of the SI increase of the foot bones is thought  
43 to resemble a stress response, but is not correlated to abortion of the race or  
44 development of stress fractures during the observed transcontinental multistage  
45 ultramarathon.  
46

47  
48  
49 **Competing interests**

50 None.

51  
52 **Trial registration**

53 University of Ulm, Germany Ethics Committee Nr. 78/08-UBB/se.  
54

55 **Funding statement**  
56  
57  
58  
59  
60

This project was mainly supported by the German Research Association (DFG: "Deutsche Forschungsgemeinschaft"), under grants SCHU 2514/1-1 and SCHU 2514/1-2. Other non-public funds were received from Siemens medical and the Medical Faculty of the University of Ulm. All funding was unrestricted. None of the funding bodies had any role in the study design, data collection, data analysis, data interpretation, manuscript preparation or decision to publish.

### Data sharing statement

No additional data available.

### REFERENCES

1. Schulze I. TransEurope-FootRace 2009. Bari-Nordkap - 4.487,7 km in 64 Tagesetappen. Leipzig, Germany: Engelsdorfer Verlag; 2010.
2. Wilder RP, Sethi S. Overuse injuries: tendinopathies, stress fractures, compartment syndrome, and shin splints. *Clin Sports Med*. 2004;**23**(1):55-81,vi.
3. Koh ES, Lee JC, Healy JC. MRI of overuse injury in elite athletes. *Clin Radiol*. 2007;**62**(11):1036-43. Formatted: German (Germany)
4. Reiter M, Ulreich N, Dirisamer A, et al. [Extended field-of-view sonography in Achilles tendon disease: a comparison with MR imaging]. *Fortschr Roentgenstr*. 2004;**176**(5):704-8.
5. Bleakney RR, White LM. Imaging of the Achilles tendon. *Foot Ankle Clin*. 2005;**10**(2):239-54. Formatted: Dutch (Netherlands)
6. Sijbrandij ES, van Gils AP, de Lange EE. Overuse and sports-related injuries of the ankle and hind foot: MR imaging findings. *Eur J Radiol*. 2002;**43**(1):45-56.
7. Haverstock BD. Foot and ankle imaging in the athlete. *Clin Podiatr Med Surg*. 2008;**25**(2):249-62, vi-vii. Formatted: Danish
8. Trappeniers L, De Maeseneer M, De Ridder F, et al. Can bone marrow edema be seen on STIR images of the ankle and foot after 1 week of running? *Eur J Radiol*. 2003;**47**(1):25-8.
9. Jones BH, Harris JM, Vinh TN, et al. Exercise-induced stress fractures and stress reactions of bone: epidemiology, etiology, and classification. *Exerc Sport Sci Rev*. 1989;**17**:379-422. Formatted: Norwegian (Bokmål)
10. Milgrom C, Giladi M, Stein M, et al. Stress fractures in military recruits. A prospective study showing an unusually high incidence. *J Bone Joint Surg Br*. 1985;**67**(5):732-5.
11. Shalabi A, Svensson L, Kristoffersen-Wiberg M, et al. Tendon injury and repair after core biopsies in chronic Achilles tendinosis evaluated by serial magnetic resonance imaging. *Br J Sports Med*. 2004;**38**(5):606-12.
12. Rosenberg ZS, Beltran J, Bencardino JT. From the RSNA Refresher Courses. Radiological Society of North America. MR imaging of the ankle and foot. *Radiographics*. 2000;**20**:S153-79.
13. Collins MS. Imaging evaluation of chronic ankle and hindfoot pain in athletes. *Magn Reson Imaging Clin N Am*. 2008;**16**(1):39-58,v-vi.
14. Campbell SE. MRI of sports injuries of the ankle. *Clin Sports Med*. 2006;**25**(4):727-62.
15. Freund W, Billich C, Brambs HJ, et al. [MRI Changes of Achilles Tendon and Hindfoot in Experienced Runners and Beginners during Training and after a (Half)-Marathon Competition.]. *Z Orthop Unfall*. 2011;**149**(4):407-17. Formatted: German (Germany)
16. R\_Development\_Core\_Team. R: A language and environment for statistical computing. 2.11.1 ed. Vienna: R Foundation for Statistical Computing; 2010.



- 1  
2  
3  
4  
5  
6  
7 17. Pinheiro J, Bates D, DebRoy S, et al. nlme: Linear and Nonlinear Mixed Effects  
8 Models. R package version 3.1-86. In: Team tRDC, editor. 3.1-86 ed. Vienna: R Foundation  
9 for Statistical Computing; 2007.
- 10 18. Bland JM, Altman DG. Statistical methods for assessing agreement between two  
11 methods of clinical measurement. *Lancet*. 1986;**1**(8476):307-10.
- 12 19. Jepsen JR, Laursen LH, Hagert CG, et al. Diagnostic accuracy of the neurological  
13 upper limb examination I: inter-rater reproducibility of selected findings and patterns. *BMC*  
14 *Neurol*. 2006;**6**:8.
- 15 20. Portney LG, Watkins MP. Correlations. Foundations of clinical research:  
16 Applications to practice. Upper Saddle River: Prentice Hall Health; 2000. p. 491-508.
- 17 21. Nicholson CW, Berlet GC, Lee TH. Prediction of the success of nonoperative  
18 treatment of insertional Achilles tendinosis based on MRI. *Foot Ankle Int*. 2007;**28**(4):472-7.
- 19 22. Ohberg L, Lorentzon R, Alfredson H. Eccentric training in patients with chronic  
20 Achilles tendinosis: normalised tendon structure and decreased thickness at follow up. *Br J*  
21 *Sports Med*. 2004;**38**(1):8-11.
- 22 23. Kongsgaard M, Aagaard P, Kjaer M, et al. Structural Achilles tendon properties in  
23 athletes subjected to different exercise modes and in Achilles tendon rupture patients. *J Appl*  
24 *Physiol*. 2005;**99**(5):1965-71. Epub 2005/08/06.
- 25 24. Gardin A, Bruno J, Movin T, et al. Magnetic resonance signal, rather than tendon  
26 volume, correlates to pain and functional impairment in chronic Achilles tendinopathy. *Acta*  
27 *Radiol*. 2006;**47**(7):718-24.
- 28 25. Haims AH, Schweitzer ME, Patel RS, et al. MR imaging of the Achilles tendon:  
29 overlap of findings in symptomatic and asymptomatic individuals. *Skeletal Radiol*.  
30 2000;**29**(11):640-5.
- 31 26. Lohman M, Kivisaari A, Vehmas T, et al. MRI abnormalities of foot and ankle in  
32 asymptomatic, physically active individuals. *Skeletal Radiol*. 2001;**30**(2):61-6.
- 33 27. Lazzarini KM, Troiano RN, Smith RC. Can running cause the appearance of marrow  
34 edema on MR images of the foot and ankle? *Radiology*. 1997;**202**(2):540-2.
- 35 28. Schweitzer ME, White LM. Does altered biomechanics cause marrow edema?  
36 *Radiology*. 1996;**198**(3):851-3.
- 37 29. Milledge JS, Bryson EI, Catley DM, et al. Sodium balance, fluid homeostasis and the  
38 renin-aldosterone system during the prolonged exercise of hill walking. *Clin Sci (Lond)*.  
39 1982;**62**(6):595-604. Epub 1982/06/01.
- 40 30. Williams ES, Ward MP, Milledge JS, et al. Effect of the exercise of seven consecutive  
41 days hill-walking on fluid homeostasis. *Clin Sci (Lond)*. 1979;**56**(4):305-16. Epub  
42 1979/04/01.
- 43 31. Knechtle B, Knechtle P, Kohler G, et al. The recovery phase following a Triple Iron  
44 triathlon *The Journal of Human Kinetics*. 2009;**21**:65-74.
- 45 32. Bracher A, Knechtle B, Gnadinger M, et al. Fluid intake and changes in limb volumes  
46 in male ultra-marathoners: does fluid overload lead to peripheral oedema? *Eur J Appl Physiol*.  
47 2012;**112**(3):991-1003. Epub 2011/07/02.
- 48 33. Knechtle B, Salas Fraire O, Andonie JL, et al. Effect of a multistage ultra-endurance  
49 triathlon on body composition: World Challenge Deca Iron Triathlon 2006. *Br J Sports Med*.  
50 2008;**42**(2):121-5; discussion 5. Epub 2007/07/03.
- 51 34. Cejka C, Knechtle B, Knechtle P, et al. An increased fluid intake leads to feet swelling  
52 in 100-km ultra-marathoners - an observational field study. *J Int Soc Sports Nutr*.  
53 2012;**9**(1):11. Epub 2012/04/05.
- 54 35. Knechtle B, Duff B, Schulze I, et al. A multi-stage ultra-endurance run over 1,200 km  
55 leads to a continuous accumulation of total body water *Journal of Sports Science and*  
56 *Medicine*. 2008;**7**:356-64.
- 57  
58  
59  
60

1  
2  
3  
4  
5  
6  
7 36. Herbst L, Knechtle B, Lopez CL, et al. Pacing Strategy and Change in Body  
8 Composition during a Deca Iron Triathlon. *Chin J Physiol.* 2011;**54**(4):255-63. Epub  
9 2011/12/02.

10 37. Grasel RP, Schweitzer ME, Kovalovich AM, et al. MR imaging of plantar fasciitis:  
11 edema, tears, and occult marrow abnormalities correlated with outcome. *AJR Am J*  
12 *Roentgenol.* 1999;**173**(3):699-701. Epub 1999/09/02.

#### 13 14 15 16 17 18 19 Contributorship

20 WF designed the study, read the images and planned the statistical analysis. He  
21 wrote the manuscript and approved the final manuscript.

22 US designed the study, acquired the MRI data, read the images and critically revised  
23 the manuscript and approved the final manuscript.

24 FW designed and performed the statistical analysis. He wrote parts of the manuscript  
25 and approved the final manuscript.

26 CB designed the study, acquired the MRI data and critically revised the manuscript  
27 and approved the final manuscript.

28 Also, MRI scanning was performed by Heike Wiedelbach.  
29  
30  
31  
32  
33  
34  
35  
36  
37  
38  
39  
40  
41  
42  
43  
44  
45  
46  
47  
48  
49  
50  
51  
52  
53  
54  
55  
56  
57  
58  
59  
60



1  
2  
3  
4  
5  
6  
7  
8  
9  
10  
11  
12  
13  
14  
15  
16  
17  
18  
19  
20  
21  
22  
23  
24  
25  
26  
27  
28  
29  
30  
31  
32  
33  
34  
35  
36  
37  
38  
39  
40  
41  
42  
43  
44  
45  
46  
47  
48  
49  
50  
51  
52  
53  
54  
55  
56  
57  
58  
59  
60

## Tables

Table 1: Measurements of MRI parameters and correlation with distance run. For quantitative data the mean (with standard error SE) is given, for qualitative data the percentage of positive measurements (mean over both readers). Correlation with distance run: P is calculated by a univariate regression model with the parameter in question as the dependent variable and total distance as the independent variable. Statistically significant correlations are in bold script.

| time point                                        |       | 1             | 2             | 3             | 4             | 5             | correlation with distance run |
|---------------------------------------------------|-------|---------------|---------------|---------------|---------------|---------------|-------------------------------|
| Parameter                                         | side  |               |               |               |               |               |                               |
| mean days run                                     |       | 0.1           | 15.5          | 29.1          | 42.8          | 52.5          |                               |
| mean distance run, in km (in miles)               |       | 5 (3.2)       | 1068 (664)    | 2062 (1282)   | 2964 (1842)   | 3669 (2280)   |                               |
| AT diameter (SE)                                  | right | 6.8 (0.37)    | 7.2 (0.44)    | 7.6 (0.54)    | 7.8 (0.53)    | 7.8 (0.55)    | <b>&lt;0.001</b>              |
|                                                   | left  | 6.8 (0.39)    | 7.3 (0.49)    | 7.6 (0.53)    | 7.7 (0.60)    | 7.8 (0.66)    | <b>&lt;0.001</b>              |
| SI at insertion of AT                             | right | 32.4 (3.96)   | 38.5 (5.39)   | 40.0 (6.49)   | 42.1 (7.08)   | 39.2 (7.43)   | 0.6                           |
|                                                   | left  | 30.4 (1.80)   | 31.8 (2.72)   | 28.5 (1.50)   | 32.2 (2.37)   | 29.5 (1.77)   | 0.5                           |
| SI in the middle of the AT                        | right | 35.9 (2.72)   | 42.9 (6.03)   | 45.5 (4.94)   | 42.2 (6.52)   | 47.9 (8.97)   | 0.05                          |
|                                                   | left  | 38.3 (3.92)   | 41.1 (5.28)   | 36.4 (3.06)   | 36.7 (3.80)   | 34.1 (5.42)   | 0.7                           |
| New lesions in the AT                             | right | NA            | 0.06          | 0.15          | 0             | 0             | 0.33                          |
|                                                   | left  | NA            | 0.03          | 0             | 0.09          | 0             | 0.7                           |
| Distance of the lesion to the insertion of the AT | right | 12.7 (4.02)   | 15.6 (5.19)   | 16.5 (3.52)   | 15.8 (4.23)   | 11.9 (6.03)   |                               |
|                                                   | left  | 21.8 (4.57)   | 21.5 (2.50)   | 26.2 (6.19)   | 24 (6.03)     | 19            |                               |
| SI in the calcaneus at the AT insertion           | right | 112.8 (7.30)  | 153.3 (13.80) | 170.6 (15.66) | 176.8 (19.66) | 180.1 (18.97) | <b>&lt;0.001</b>              |
|                                                   | left  | 107.2 (5.38)  | 144.7 (9.90)  | 160.2 (11.70) | 160.5 (11.54) | 167.0 (12.65) | <b>&lt;0.001</b>              |
| SI in an innocuous area of the calcaneus          | right | 158.2 (6.78)  | 210.8 (18.25) | 243.9 (22.59) | 246.1 (27.49) | 250.2 (26.43) | <b>&lt;0.001</b>              |
|                                                   | left  | 164.0 (7.20)  | 216.4 (14.38) | 248.8 (21.45) | 251.5 (25.1)  | 268.6 (25.33) | <b>&lt;0.001</b>              |
| Maximal SI in any bone                            | right | 312.5 (26.58) | 411.7 (30.17) | 423.3 (32.14) | 386.2 (22.29) | 399.9 (26.10) | <b>0.003</b>                  |
|                                                   | left  | 283.4 (24.29) | 357.7 (24.59) | 385.8 (35.06) | 410.7 (35.43) | 417.3 (39.79) | <b>&lt;0.001</b>              |
| Number of bone lesions                            | right | 2.1 (0.6)     | 3.2 (0.62)    | 3.5 (0.58)    | 3.2 (0.59)    | 3.6 (0.61)    | <b>0.016</b>                  |
|                                                   | left  | 2.3 (0.44)    | 2.4 (0.43)    | 2.3 (0.45)    | 3.1 (0.54)    | 3.2 (0.55)    | <b>0.002</b>                  |
| SI in the plantar aponeurosis                     | right | 25.4          | 28            | 27.9          | 33.7          | 34.8          | 0.4                           |

|                                        |       |                |                |                |                |                |                  |
|----------------------------------------|-------|----------------|----------------|----------------|----------------|----------------|------------------|
|                                        |       | (4.95)         | (5.79)         | (6.59)         | (8.86)         | (9.54)         |                  |
|                                        | left  | 21.4<br>(1.31) | 22.4<br>(1.29) | 22.3<br>(1.31) | 22.1<br>(2.14) | 20.9<br>(1.37) | 0.2              |
| Edema in the plantar aponeurosis (y/n) | right | 0.07           | 0.06           | 0.09           | 0.11           | 0.12           | 0.9              |
|                                        | left  | 0              | 0              | 0              | 0.04           | 0              | n.a.             |
| Retrocalcaneal Bursa (y/n)             | right | 0.07           | 0.19           | 0.18           | 0.14           | 0.15           | 0.8              |
|                                        | left  | 0.03           | 0.21           | 0.24           | 0.18           | 0.12           | 0.3              |
| Subcutaneous edema (y/n)               | right | 0.05           | 0.64           | 0.65           | 0.79           | 0.81           | <b>&lt;0.001</b> |
|                                        | left  | 0.07           | 0.68           | 0.61           | 0.64           | 0.65           | <b>&lt;0.001</b> |

1  
2  
3  
4  
5  
6  
7  
8  
9  
10  
11  
12  
13  
14  
15  
16  
17  
18  
19  
20  
21  
22  
23  
24  
25  
26  
27  
28  
29  
30  
31  
32  
33  
34  
35  
36  
37  
38  
39  
40  
41  
42  
43  
44  
45  
46  
47  
48  
49  
50  
51  
52  
53  
54  
55  
56  
57  
58  
59  
60

Table 2: Stated causes for abortion of the run in participating Athletes.

| <b>Athlete</b> | <b>Pathology</b>                                |
|----------------|-------------------------------------------------|
| 1              | Perimyositis of the thigh                       |
| 2              | Stress fracture of the tibia                    |
| 3              | Hallux valgus / bunion                          |
| 4              | Phlegmonia of the hand                          |
| 5              | Shin splint                                     |
| 6              | Perimyositis of the lower leg                   |
| 7              | Perimyositis of the thigh                       |
| 8              | Shin splint                                     |
| 9              | Perimyositis, gluteal and shin splint bilateral |
| 10             | Shin splint                                     |

## Legends

Figure 1: Measurements of MRI parameters on a sagittal STIR weighted MRI scan.

a)

PF: The measurement in the plantar fascia.

BE: Bone edema (in the medial cuneiform bone)

Short and long arrows pointing to measurements in the Achilles tendon (AT). The short arrow points to a intratendinous lesion near the insertion, the long arrow points to a innocuous area situated cranially.

b)

The measurement of the normally innocuous region of the calcaneus is placed between the most cranial portion of the posterior talocalcaneal facet and the most caudal point of the lateral process of the calcaneus (see arrows and round measurement site).

Figure 2: Subcutaneous edema on a sagittal STIR weighted MRI scan.

The six dates represent different MRI measurements of the same foot of one TEF09 participant, each with identical window settings.

The long diagonal arrow points to tubular high intensity structures, probably corresponding to peritendinous fluid.

The short arrow points to subcutaneous edema and edema in Kager's fat pad of the AT.

The translucent arrow points to intraosseous signal near the AT insertion evolving later than the subcutaneous edema.

Figure 3: Makeshift sandals.

Subcutaneous edema resulting in ankle (black arrow) and foot swelling (white arrows) necessitated cutting away parts of the shoes, creating makeshift sandals to accommodate the athletes' feet.

Figure 4: Intraosseous signal intensity in the time course of the TEF09.

Signal intensity measurements in the calcaneus at AT insertion (black triangles), in a normally innocuous area of the calcaneus (gray squares) and at the individual's area of the highest intraosseous signal (black dots) are shown together with the standard error values. The measurements were performed at several time points during the TEF09. The cumulative distance run is shown below the graph.



Figure 1: Measurements of MRI parameters on a sagittal STIR weighted MRI scan.

a)

PF: The measurement in the plantar fascia.

BE: Bone edema (in the medial cuneiform bone)

Short and long arrows pointing to measurements in the Achilles tendon (AT). The short arrow points to a intratendinous lesion near the insertion, the long arrow points to a innocuous area situated cranially.

b)

The measurement of the normally innocuous region of the calcaneus is placed between the most cranial portion of the posterior talocalcaneal facet and the most caudal point of the lateral process of the calcaneus (see arrows and round measurement site).



Figure 2: Subcutaneous edema on a sagittal STIR weighted MRI scan.

The six dates represent different MRI measurements of the same foot of one TEFRO9 participant, each with identical window settings.

The long diagonal arrow points to tubular high intensity structures, probably corresponding to peritendinous fluid.

The short arrow points to subcutaneous edema and edema in Kager's fat pad of the AT.

The translucent arrow points to intraosseous signal near the AT insertion evolving later than the subcutaneous edema.

114x137mm (300 x 300 DPI)



1  
2  
3  
4  
5  
6  
7  
8  
9  
10  
11  
12  
13  
14  
15  
16  
17  
18  
19  
20  
21  
22  
23  
24  
25  
26  
27  
28  
29  
30  
31  
32  
33  
34  
35  
36  
37  
38  
39  
40  
41  
42  
43  
44  
45  
46  
47  
48  
49  
50  
51  
52  
53  
54  
55  
56  
57  
58  
59  
60



Figure 3: Makeshift sandals.  
Subcutaneous edema resulting in ankle (black arrow) and foot swelling (white arrows) necessitated cutting away parts of the shoes, creating makeshift sandals to accommodate the athletes' feet.





Figure 4: Figure 4: Intraosseous signal intensity in the time course of the TEFRO9.

Signal intensity measurements in the calcaneus at AT insertion (black triangles), in a normally innocuous area of the calcaneus (gray squares) and at the individual's area of the highest intraosseous signal (black dots) are shown together with the standard error values. The measurements were performed at several time points during the TEFRO9. The cumulative distance run is shown below the graph.

141x68mm (300 x 300 DPI)

review only

1  
2  
3  
4  
5  
6  
7  
8  
9  
10  
11  
12  
13  
14  
15  
16  
17  
18  
19  
20  
21  
22  
23  
24  
25  
26  
27  
28  
29  
30  
31  
32  
33  
34  
35  
36  
37  
38  
39  
40  
41  
42  
43  
44  
45  
46  
47  
48  
49  
50  
51  
52  
53  
54  
55  
56  
57  
58  
59  
60

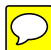

## STROBE Statement—Items to be included when reporting observational studies in a conference abstract

| Item                | Recommendation                                                                                                                                                                                                                              |                 |
|---------------------|---------------------------------------------------------------------------------------------------------------------------------------------------------------------------------------------------------------------------------------------|-----------------|
| Title               | Indicate the study's design with a commonly used term in the title (e.g cohort, case-control, cross sectional)                                                                                                                              | <b>APPROVED</b> |
| Authors             | Contact details for the corresponding author                                                                                                                                                                                                | <b>APPROVED</b> |
| Study design        | Description of the study design (e.g cohort, case-control, cross sectional)                                                                                                                                                                 | <b>APPROVED</b> |
| Objective           | Specific objectives or hypothesis                                                                                                                                                                                                           | <b>APPROVED</b> |
| <b>Methods</b>      |                                                                                                                                                                                                                                             |                 |
| Setting             | Description of setting, follow-up dates or dates at which the outcome events occurred or at which the outcomes were present, as well as any points or ranges on other time scales for the outcomes (e.g., prevalence at age 18, 1998-2007). | <b>APPROVED</b> |
| Participants        | <i>Cohort study</i> —Give the most important eligibility criteria, and the most important sources and methods of selection of participants. Describe briefly the methods of follow-up                                                       | <b>APPROVED</b> |
|                     | <i>Case-control study</i> —Give the major eligibility criteria, and the major sources and methods of case ascertainment and control selection                                                                                               |                 |
|                     | <i>Cross-sectional study</i> —Give the eligibility criteria, and the major sources and methods of selection of participants                                                                                                                 |                 |
| Variables           | <i>Cohort study</i> —For matched studies, give matching and number of exposed and unexposed                                                                                                                                                 |                 |
|                     | <i>Case-control study</i> —For matched studies, give matching criteria and the number of controls per case                                                                                                                                  |                 |
| Statistical methods | Clearly define primary outcome for this report.                                                                                                                                                                                             | <b>APPROVED</b> |
| Statistical methods | Describe statistical methods, including those used to control for confounding                                                                                                                                                               | <b>APPROVED</b> |
| <b>Results</b>      |                                                                                                                                                                                                                                             |                 |
| Participants        | Report Number of participants at the beginning and end of the study                                                                                                                                                                         | <b>APPROVED</b> |
| Main results        | Report estimates of associations. If relevant, consider translating estimates of relative risk into absolute risk for a meaningful time period                                                                                              | <b>APPROVED</b> |
|                     | Report appropriate measures of variability and uncertainty (e.g., odds ratios with confidence intervals)                                                                                                                                    |                 |
| Conclusions         | General interpretation of study results                                                                                                                                                                                                     | <b>APPROVED</b> |
